# Supplementary material for: Unravelling the potency of triazole analogues for inhibiting α-synuclein fibrillogenesis andin vitrodisaggregation
Source: Royal Society of Chemistry journal article supplement (doi:10.1039/d0ob02226h), 2021-01-01
Supplement: d0ob02226h1.pdf [file d0ob02226h1.pdf]

## Supporting information File

### Unravelling the potency of triazole analogues for inhibiting $\alpha$ -Synuclein fibrillogenesis and *in vitro* disaggregation

Mudasir Maqbool<sup>1</sup>, Joshna Gadhavi<sup>2</sup>, Anju Singh<sup>1</sup>, Pravin Hivare<sup>2</sup>, Sharad  
Gupta<sup>2\*</sup>, Nasimul Hoda<sup>1\*</sup>

<sup>1</sup>Drug Design and Synthesis Lab., Department of Chemistry, Jamia Millia Islamia, Jamia  
Nagar, New Delhi-110025, India.

<sup>2</sup>Biological Engineering, Indian Institute of Technology Gandhinagar, Palaj, Gandhinagar,  
Gujarat, India.

#### Corresponding authors:

Nasimul Hoda, PhD  
Professor  
Department of Chemistry,  
Jamia Millia Islamia,  
Jamia Nagar, New Delhi-110025, India.  
Email: [nhoda@jmi.ac.in](mailto:nhoda@jmi.ac.in)

Sharad Gupta, PhD  
Associate Professor  
Biological Engineering,  
Indian Institute of Technology Gandhinagar,  
Palaj, Gandhinagar, Gujarat, India  
E-mail: [sharad@iitgn.ac.in](mailto:sharad@iitgn.ac.in)

### Scheme S1: Scheme for the synthesis of different azides

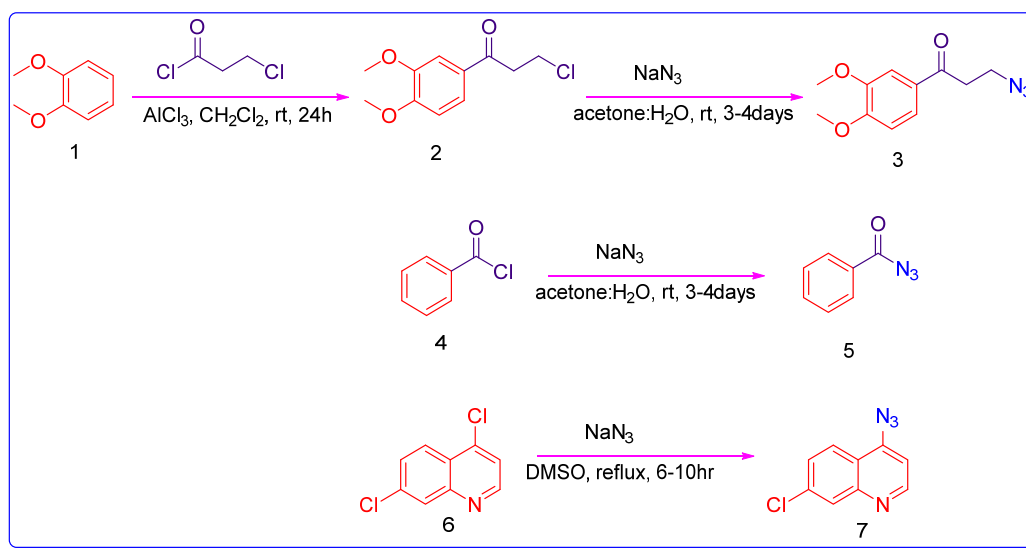

### Scheme S2: Synthetic scheme for the synthesis of different alkynes

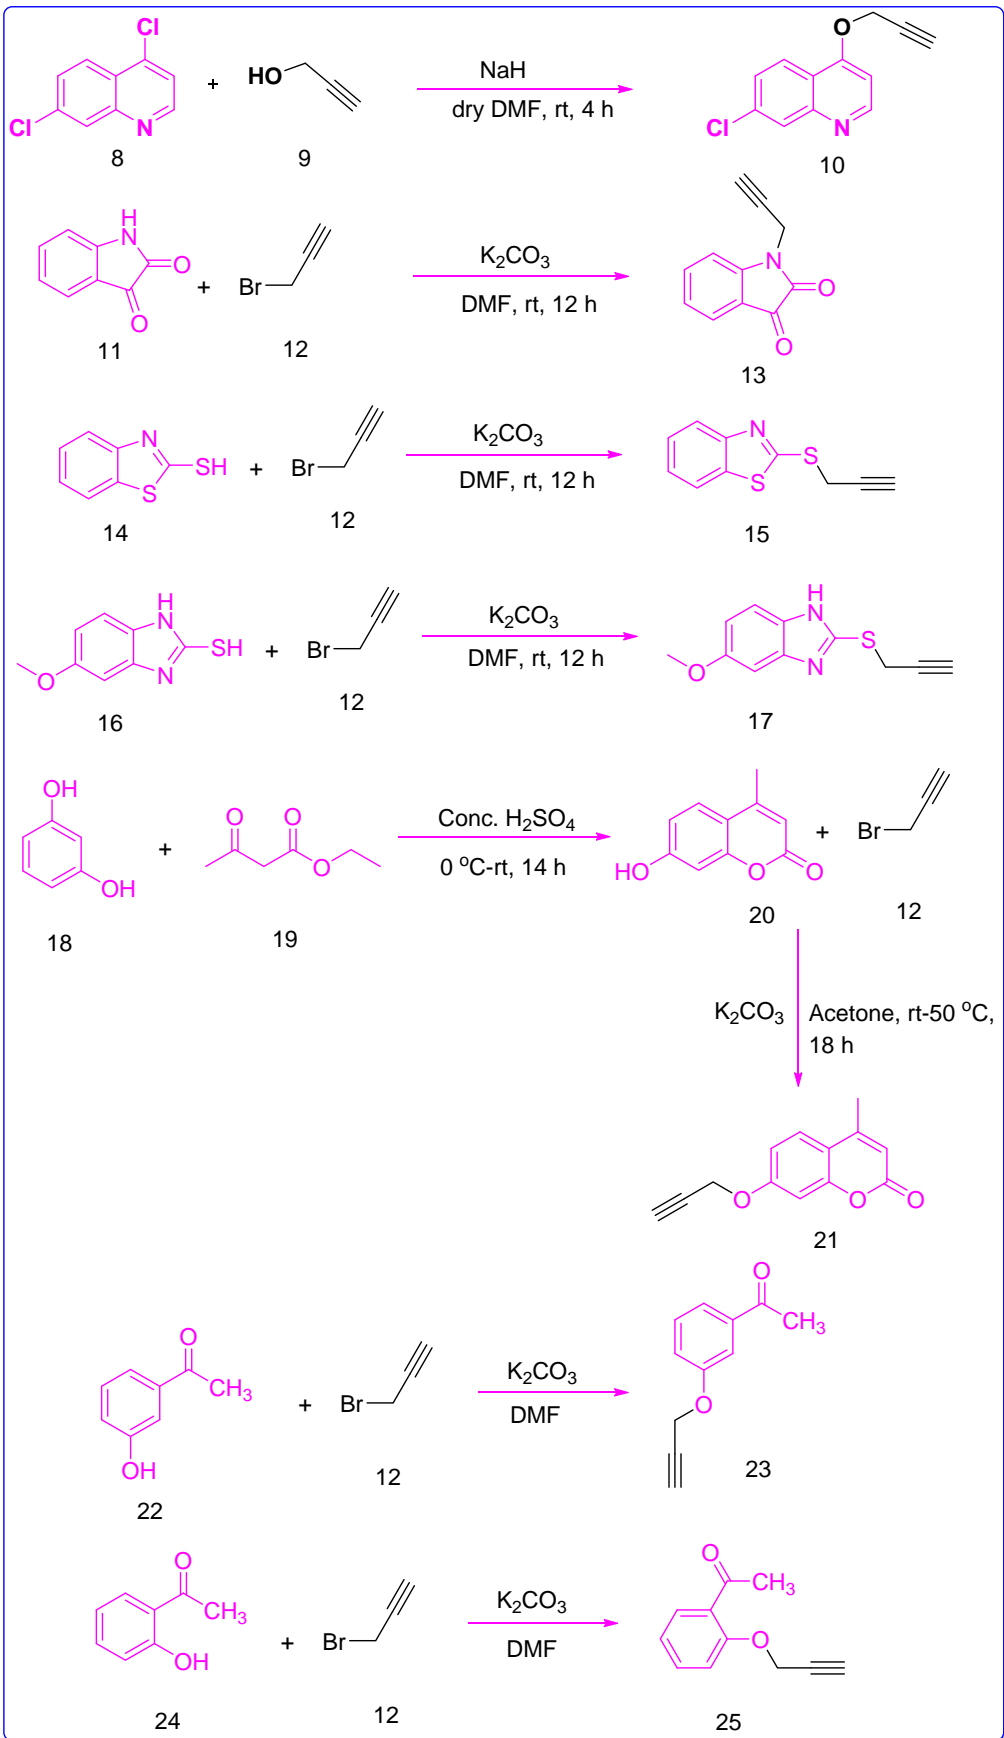

## Chemistry

### Procedure for the synthesis of compound 2

A mixture of aluminium chloride (5.3 g, 39.7 mol) and 25 mL DCM was allowed for stirring at room temperature. 3-chloropropionylchloride (5.5 g, 43.3 mol) dissolved in 20 mL DCM was added dropwise to the stirring solution of AlCl<sub>3</sub>. After half an hour, 1,2-dimethoxybenzene (5.0 g, 36.1 mol) was added to the reaction mixture and the mixture was allowed for stirring for 24 h at room temperature. On the completion of the reaction, the reaction mixture was poured into ice-cold water and the organic part was derived with DCM (50 mL x 3). The organic layer was washed with sodium bicarbonate and brine solution and was dried over Na<sub>2</sub>SO<sub>4</sub>. The crude product (**2**) obtained was purified by column chromatography using ethylacetate/hexanes (25:75) in 65.5% yield.

### Procedure adopted for the synthesis of compounds 3 and 5

10.6 mol of chloro-compound (**2** or **4**) was dissolved in 30 mL acetone. An aqueous solution of sodium azide (63.0 mol) was added dropwise to the stirring solution at room temperature. The reaction took 3–4 days for completion. The reaction mixture was poured into ice-cold water and the organic part was extracted with diethyl ether (30 mL x 3). The organic layer was dried over Na<sub>2</sub>SO<sub>4</sub>. The compounds obtained (**3** and **5**) in 65–75% yield were used for onward reaction steps without purification.

### Procedure followed for the synthesis of compound 7

To a solution of 4,7-dichloroquinoline (1.0 g, 5.0 mol) in 30 mL DMSO, NaN<sub>3</sub> (0.39 g, 6.0 mol) was added. The reaction vessel was wrapped with aluminium foil to avoid light and the mixture was allowed for stirring at room temperature for 6-10 h duration. After the disappearance of the starting materials, the reaction mixture was poured into 50 mL water and the desired product was extracted with DCM (20 mL x 3). The DCM layer was washed with brine solution and dried over Na<sub>2</sub>SO<sub>4</sub>. The crude product **7** was purified with column chromatography using ethylacetate/hexanes (40:60), in 49% yield.

### Procedure for the synthesis of compound 10

Propargyl alcohol (0.5 g, 8.9 mol) was dissolved in dry DMF at 0 °C. NaH (0.6 g, 25.0 mol) was added in small instalments and the mixture was allowed for stirring at 0 °C for half an hour. A solution of 4,7-dichloroquinoline (1.7 g, 8.5 mol) was added dropwise to the reaction mixture. The reaction was allowed for string for 4 h at room temperature. After the completion, the reaction was quenched with ice-cold water and the organic compound was obtained by ethylacetate. The organic layer was washed with brine solution and dried over



Na<sub>2</sub>SO<sub>4</sub>. The crude product **10** was purified by column chromatography using ethylacetate/hexanes (15:85) in 63% yield. The pure compound obtained was white coloured powder.

**General procedure for the synthesis of terminal alkyl compounds 13,15,17, 23 and 25.**

In general, precursor compounds: **11,14,16,22** and **24** (3.32 mol) were dissolved in 30 mL dry DMF at room temperature. Potassium carbonate (4.98 mol) was added to the stirring reaction mixtures. After 1 h, 3.98 mol of propargyl bromide dissolved in 20 mL dry DMF was added dropwise. The reaction mixtures were allowed for string at room temperature till the disappearance of the starting materials (12–24 h). The reaction mixtures were poured into ice-cold water and the organic compound were obtained by ethylacetate. The organic layers were washed with brine solution and dried over Na<sub>2</sub>SO<sub>4</sub>. The crude products (**13, 15, 17, 23** and **25**) were purified by column chromatography using ethylacetate/hexanes (usually 5:95). The pure compounds obtained in 60–70% yield were proceeded for further reactions.

**Procedure for the synthesis compound 21<sup>1</sup>**

A solution of resorcinol (2.0 g, 18.16 mol) in Ethyl acetoacetate (2.4 mL, 19 mol) was added dropwise to concentrated H<sub>2</sub>SO<sub>4</sub> (20 mL) in a round bottom flask at 0 °C. The reaction was allowed for stirring overnight at room temperature. In the next morning, the reaction mixture was carefully poured into crushed ice with continuous stirring. A solid precipitate obtained was filtered, the residue was washed with cold water and dried to obtain pale yellow powder (**20**) in 49% yield. In the next step, K<sub>2</sub>CO<sub>3</sub> (1.16 g, 8.3 mol) was added to a solution of 7-hydroxy-4-methylchroman-2-one (**20**) (1 g, 5.6 mol) and acetone. The reaction mixture was allowed for stirring at room temperature for 1 h. 8.3 mol of propargyl bromide dissolved in 20 mL acetone was added dropwise to the reaction mixture. It took 18 h to complete the reaction at 50 °C. After the completion of the reaction, the acetone was removed using vacuum rota evaporator and the organic layer was extracted with ethylacetate (30 mL x 3). The organic layer was washed with brine solution and dried over Na<sub>2</sub>SO<sub>4</sub>. The crude product **21** was purified by column chromatography using ethylacetate/hexanes (15:85) in 72% yield.

## Prediction of solubility and lipophilicity

A web-based platform ADMETlab, designed on Django framework in Python for calculating chemical ADMET properties was used to predict drug likeliness of the compounds and whether these compounds can cross the BBB etc.<sup>2</sup>

**Table S1:** Predicted values of the compounds that support their ability to pass through Blood-brain barrier (BBB).

| Compounds | Molecular Weight | Volume distribution | Water solubility (LogS) | cLogD (distribution coefficient at pH 7.4) | clogP | Plasma protein binding (PPB) | Blood Brain Barrier probability | Clearance (Extraction) | H-Bond Acceptor | H-Bond Donor | Lipinski's rule |
|-----------|------------------|---------------------|-------------------------|--------------------------------------------|-------|------------------------------|---------------------------------|------------------------|-----------------|--------------|-----------------|
| Tr1       | 452.13           | -0.489              | -5.323                  | 1.788                                      | 4.349 | 90.077                       | 0.862                           | 1.022                  | 8               | 0            | ✓               |
| Tr3       | 418.16           | -0.115              | -4.825                  | 1.55                                       | 3.384 | 91.848                       | 0.86                            | 1.741                  | 8               | 0            | ✓               |
| Tr5       | 291.31           | -0.399              | -2.318                  | 0.021                                      | 1.061 | 69.557                       | 0.912                           | 1.54                   | 7               | 1            | ✓               |
| Tr6       | 364.04           | -0.462              | -5.266                  | 1.238                                      | 3.747 | 92.652                       | 0.932                           | 0.796                  | 6               | 0            | ✓               |
| Tr7       | 442.11           | -0.574              | -4.942                  | 1.734                                      | 3.768 | 92.1                         | 0.735                           | 0.739                  | 7               | 1            | ✓               |
| Tr8       | 455.16           | -0.659              | -3.967                  | 1.62                                       | 2.598 | 87.153                       | 0.684                           | 1.05                   | 6               | 0            | ✓               |
| Tr9       | 449.16           | -0.325              | -4.923                  | 1.305                                      | 3.562 | 91.85                        | 0.667                           | 1.307                  | 7               | 0            | ✓               |
| Tr10      | 418.08           | -0.425              | -5.152                  | 1.387                                      | 4.463 | 92.109                       | 0.831                           | 1.237                  | 7               | 0            | ✓               |
| Tr11      | 387.09           | -0.002              | -4.916                  | 2.84                                       | 4.284 | 84.548                       | 0.947                           | 1.189                  | 9               | 0            | ✓               |
| Tr12      | 409.02           | -0.03               | -5.735                  | 2.886                                      | 5.371 | 84.673                       | 0.93                            | 0.806                  | 7               | 1            | ✓               |
| Tr13      | 422.07           | -0.154              | -4.905                  | 1.603                                      | 4.646 | 89.554                       | 0.881                           | 1.248                  | 6               | 0            | ✓               |
| Tr14      | 409.16           | -0.312              | -4.723                  | 1.529                                      | 3.35  | 89.116                       | 0.882                           | 1.379                  | 6               | 0            | ✓               |
| Tr15      | 420.14           | -0.753              | -4.228                  | 0.712                                      | 2.298 | 91.483                       | 0.913                           | 0.959                  | 6               | 0            | ✓               |
| Tr16      | 409.16           | -0.384              | -4.702                  | 1.521                                      | 3.35  | 88.732                       | 0.867                           | 1.403                  | 8               | 0            | ✓               |
| Tr17      | 378.09           | -0.298              | -5.409                  | 1.532                                      | 4.251 | 93.711                       | 0.918                           | 0.986                  | 8               | 0            | ✓               |
| Tr18      | 378.09           | -0.272              | -5.437                  | 1.545                                      | 4.251 | 93.414                       | 0.929                           | 0.991                  | 8               | 0            | ✓               |

### Spectral data

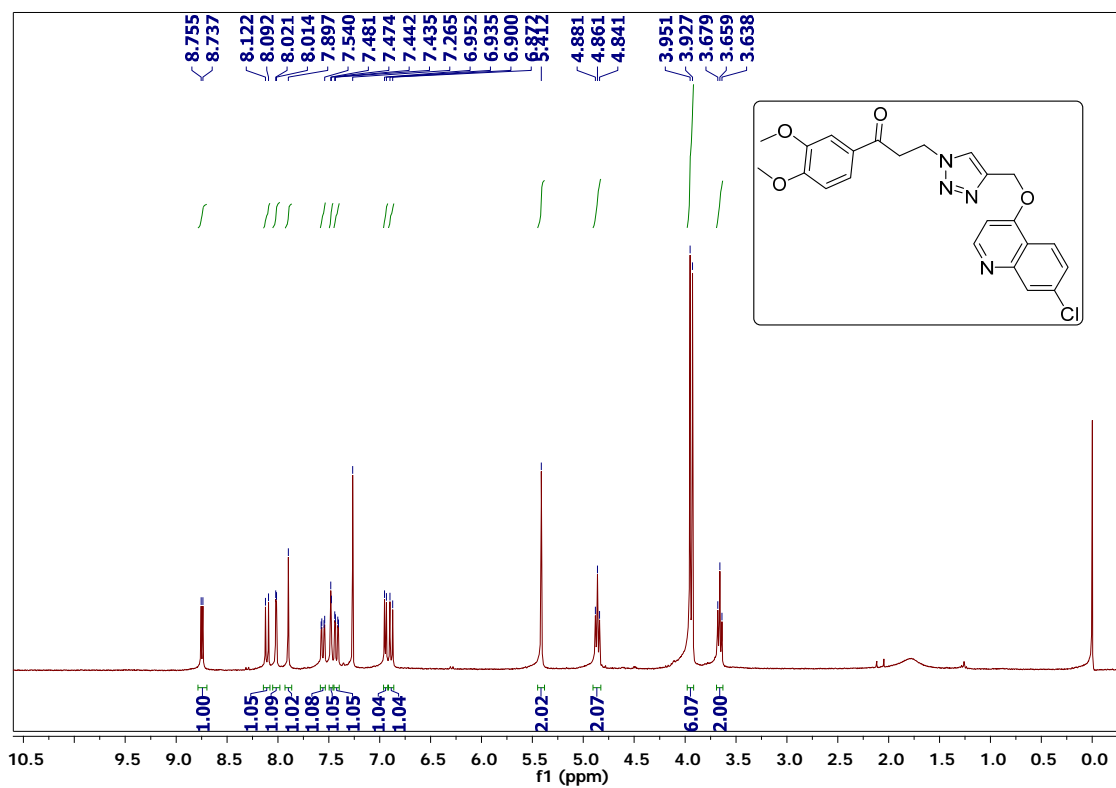

Figure S1: <sup>1</sup>H NMR of Tr1

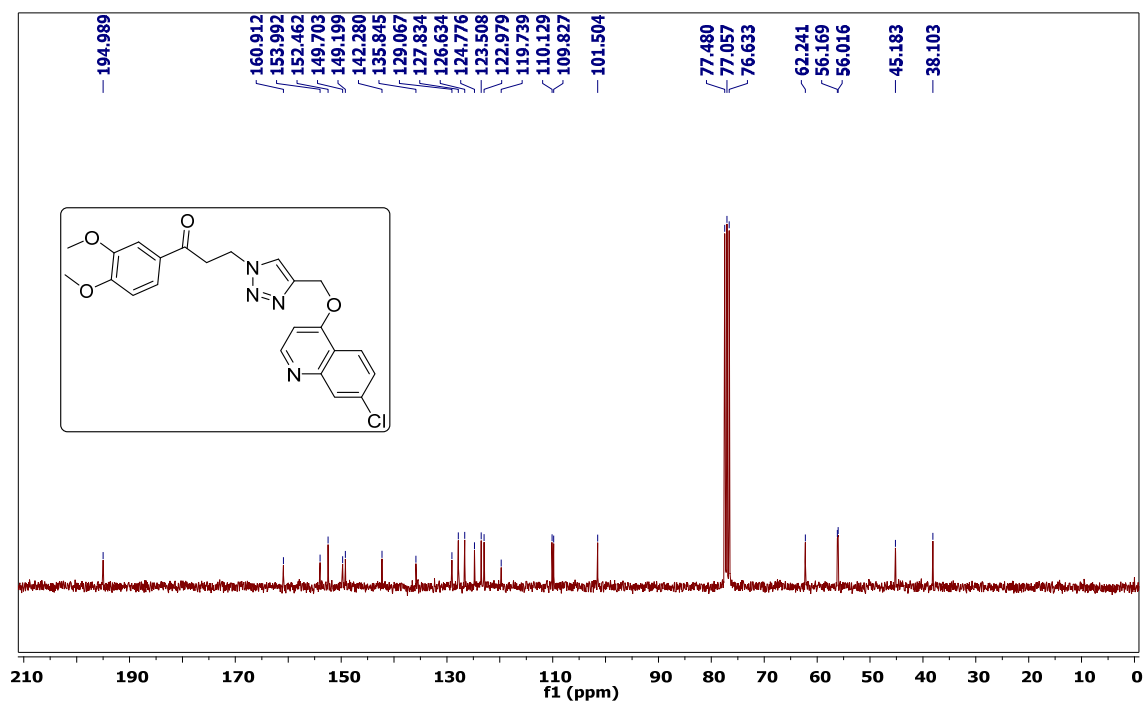

Figure S2: <sup>13</sup>C NMR of Tr1

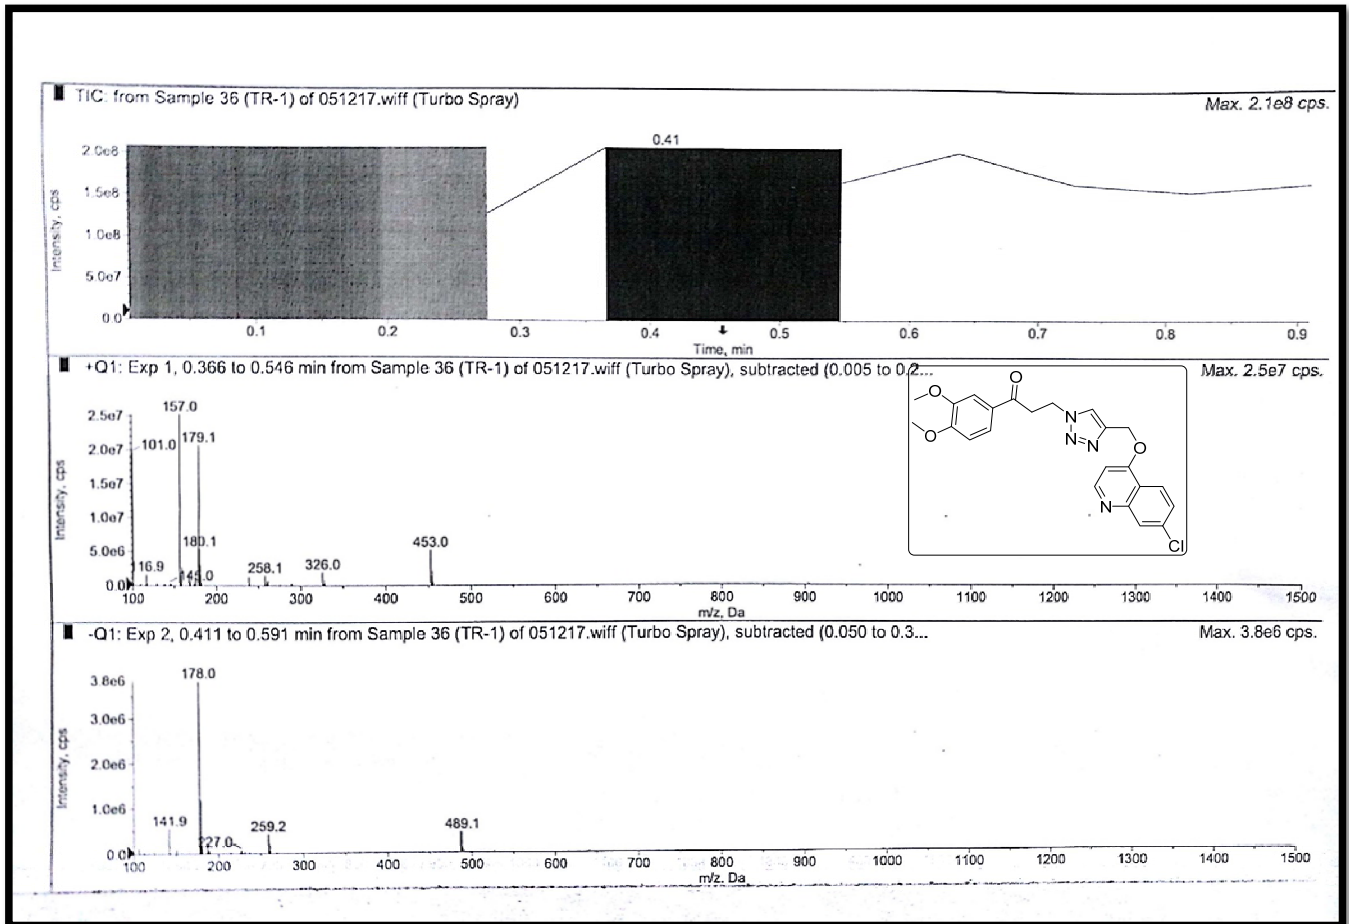

Figure S3: Mass spectrum of Tr1

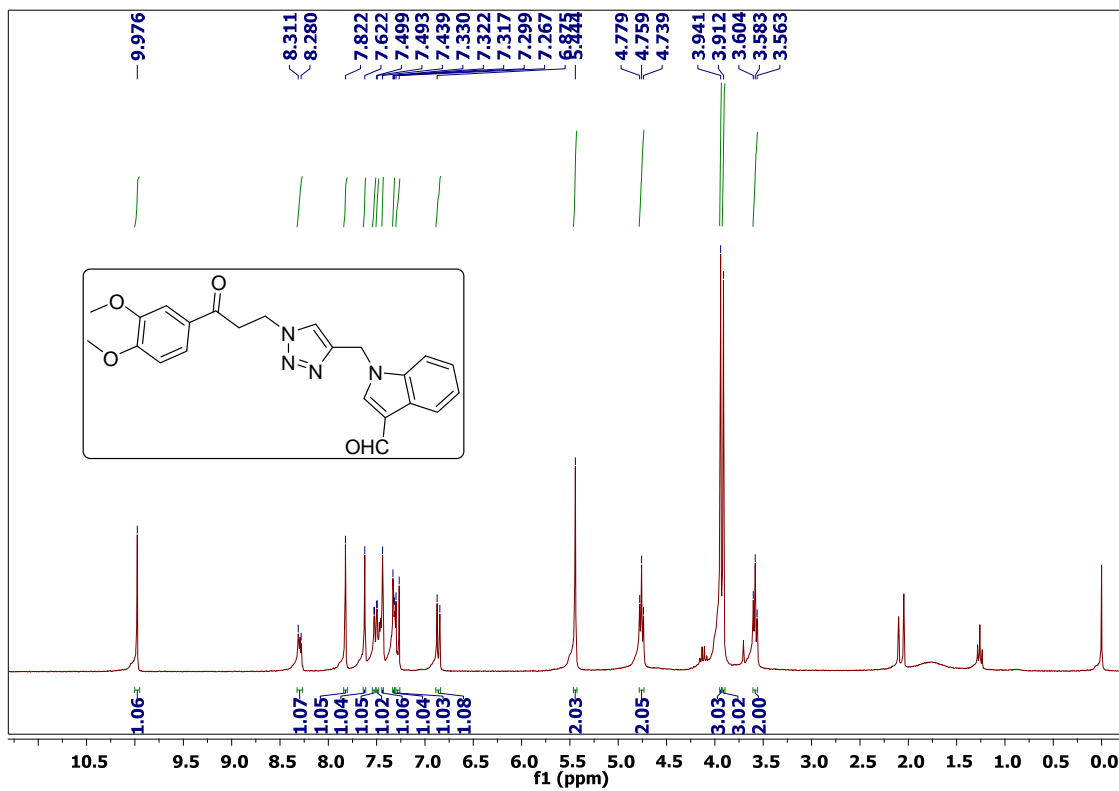

Figure S4: <sup>1</sup>H NMR of Tr3

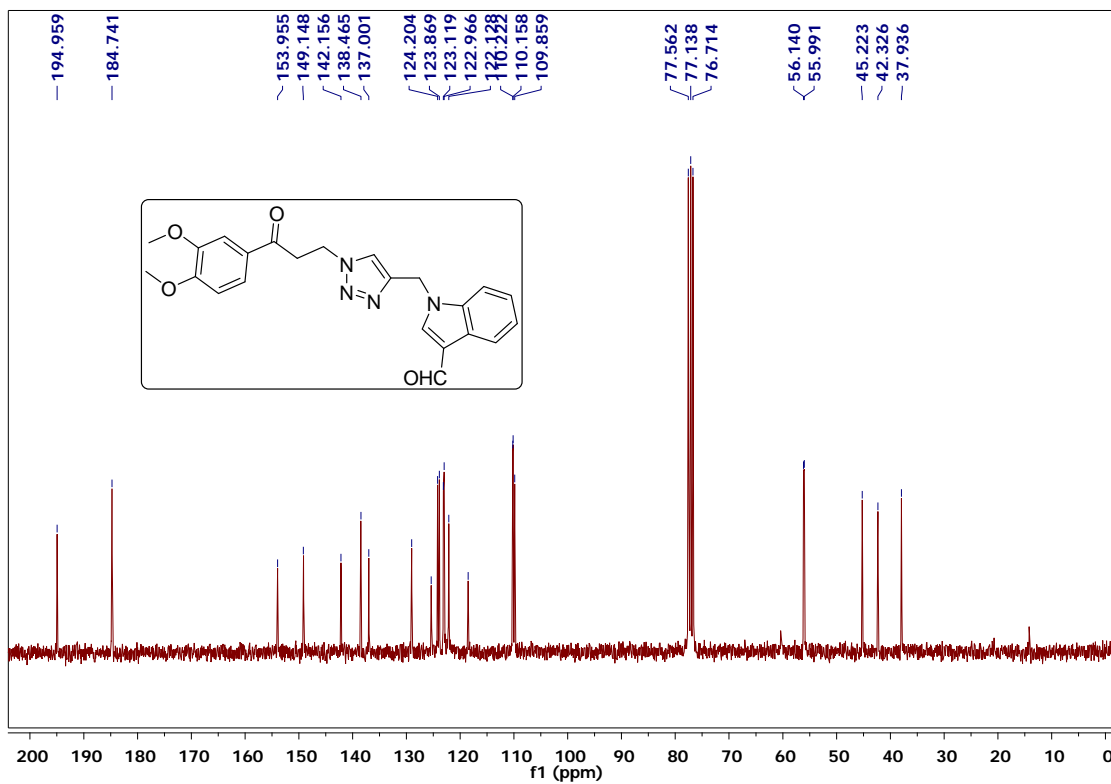

Figure S5: <sup>13</sup>C NMR of Tr3

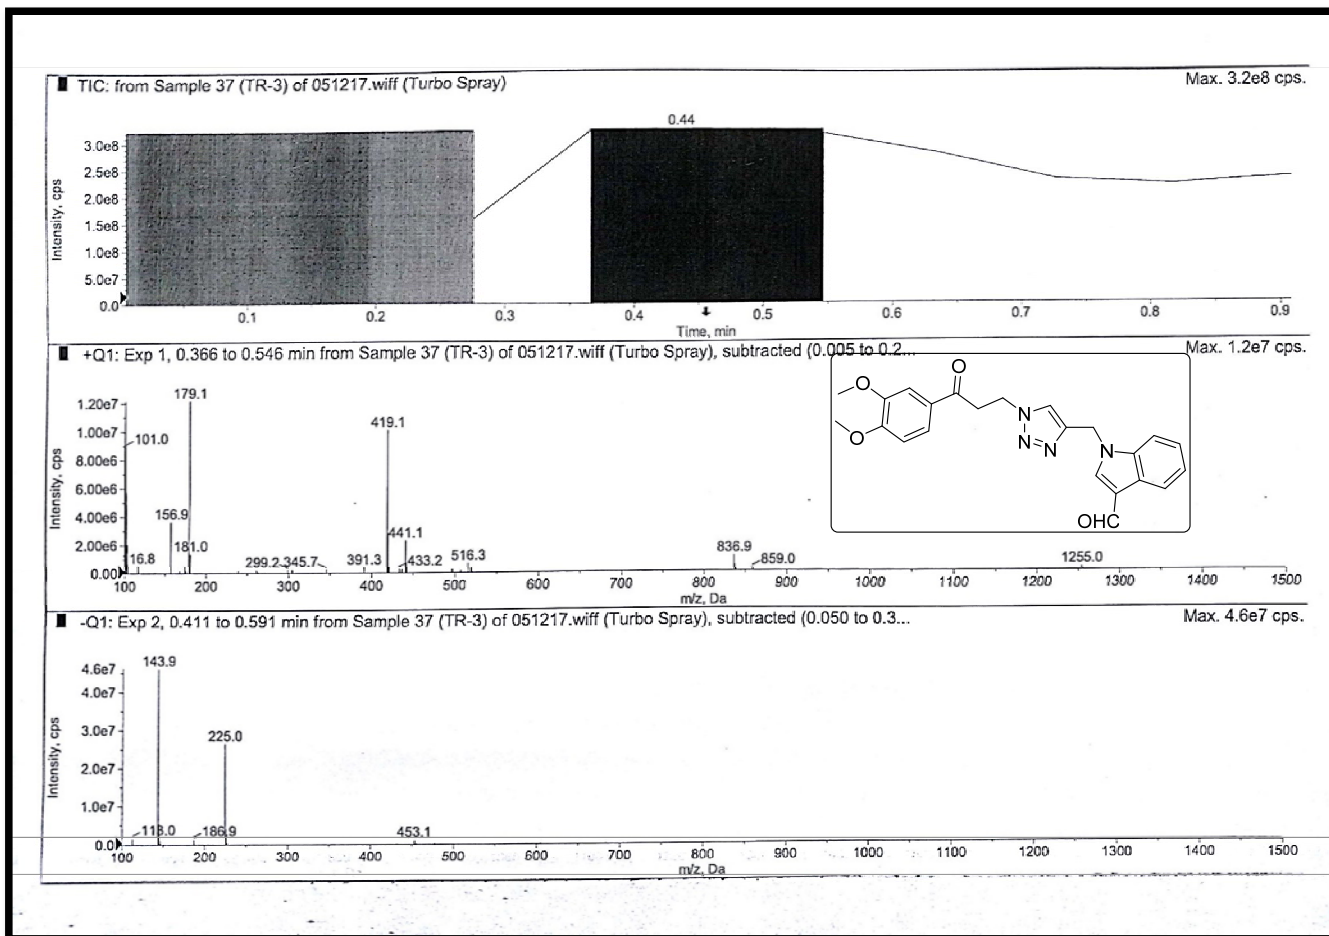

Figure S6: Mass spectrum of Tr3

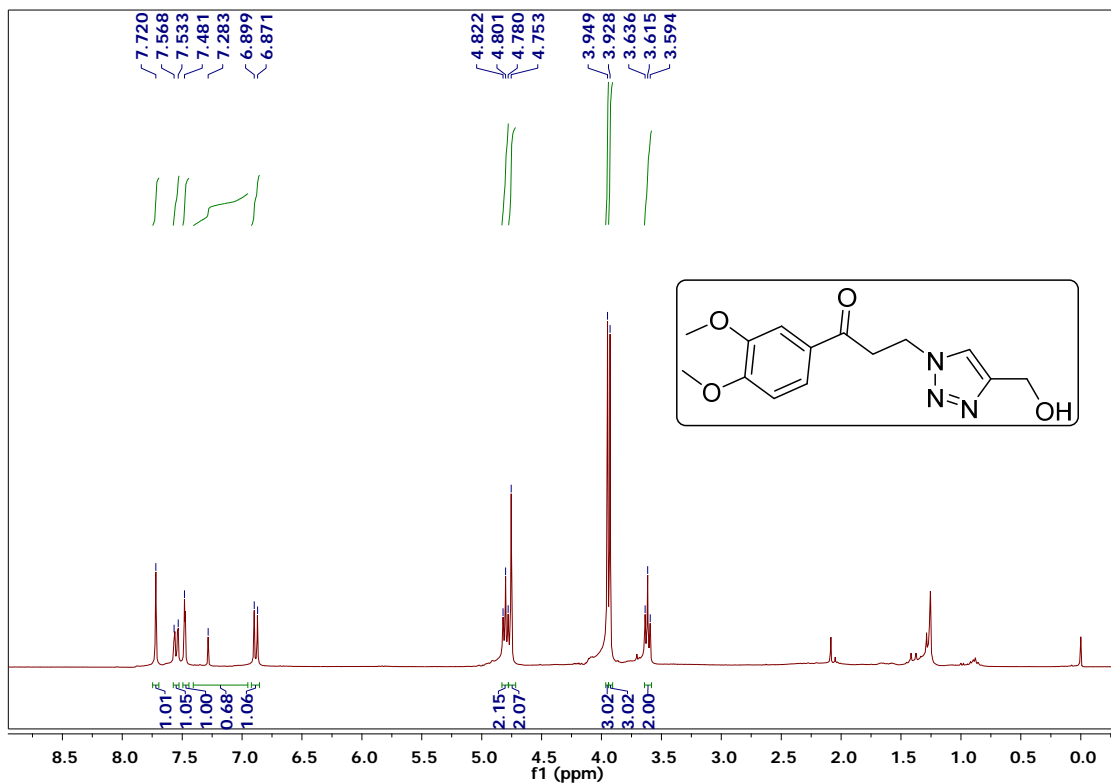

Figure S7:  $^1\text{H}$  NMR of Tr5

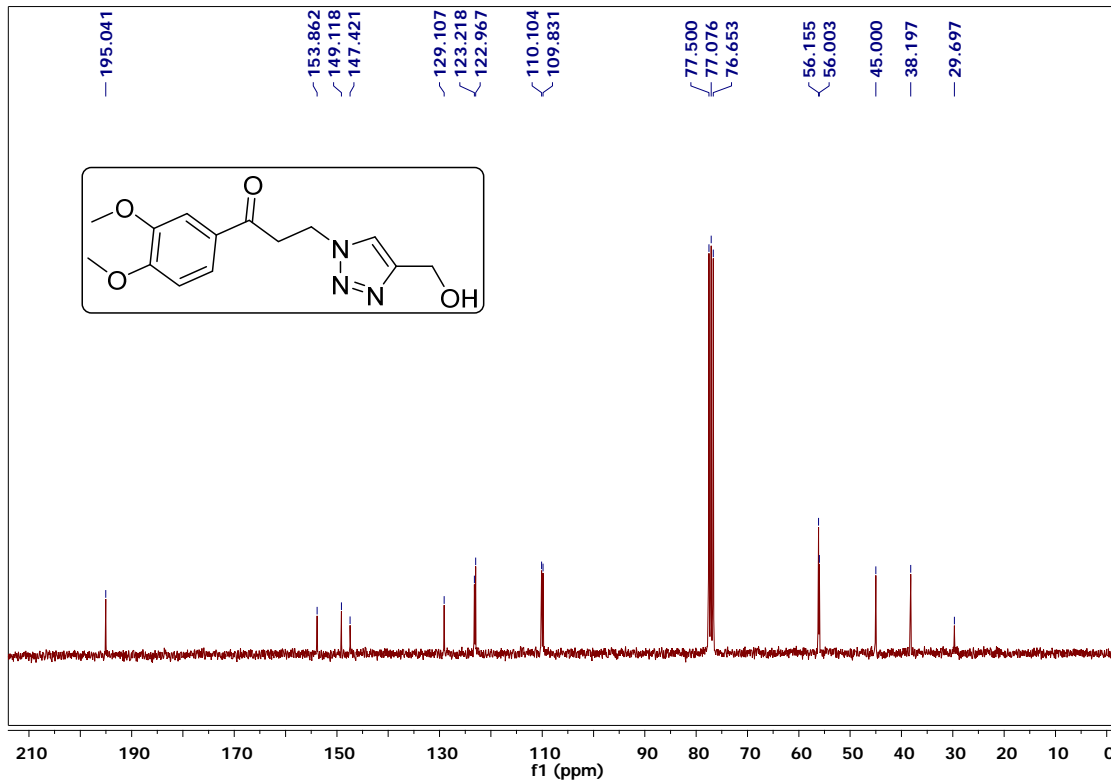

Figure S8:  $^{13}\text{C}$  NMR of Tr5

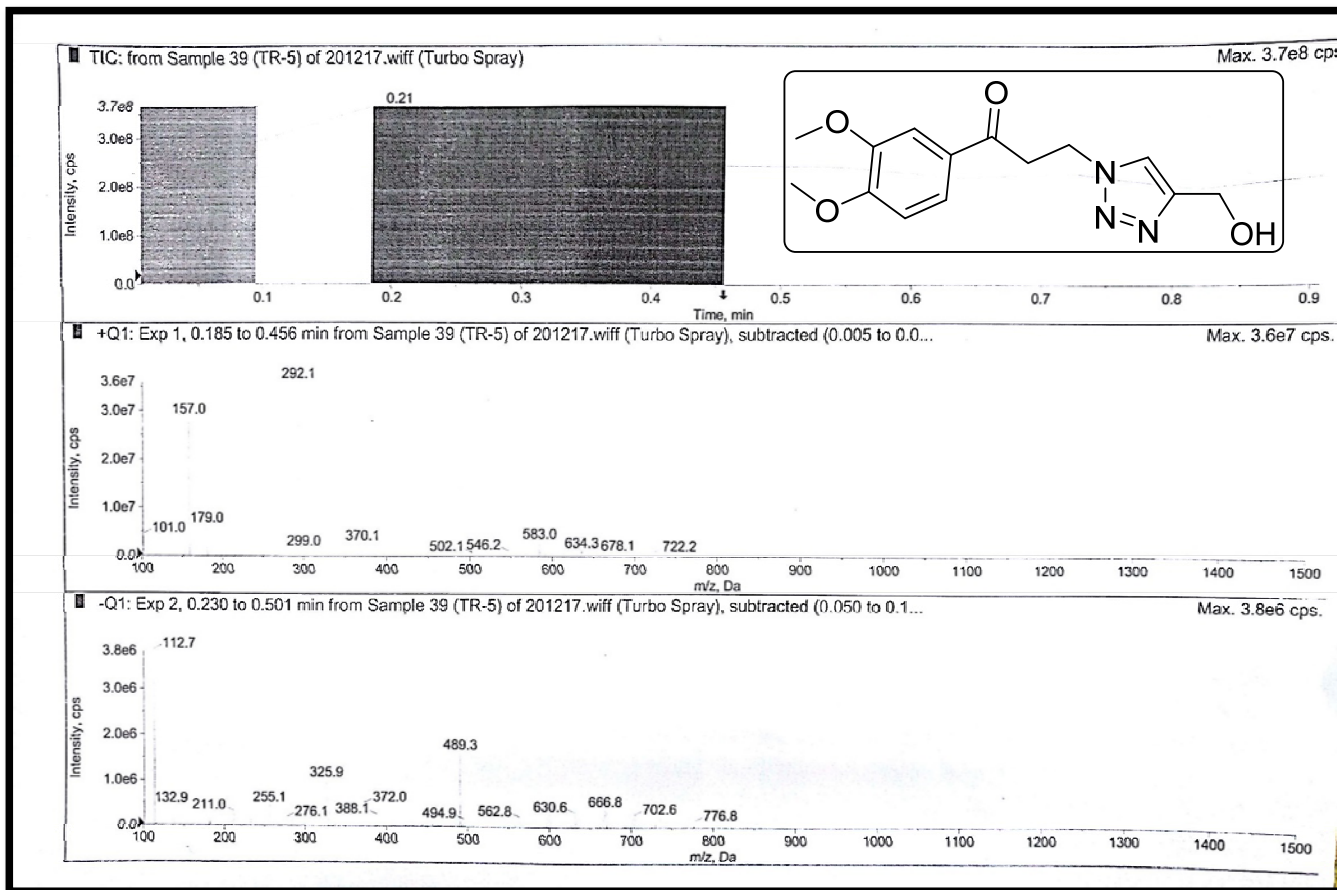

Figure S9: Mass spectrum of Tr5



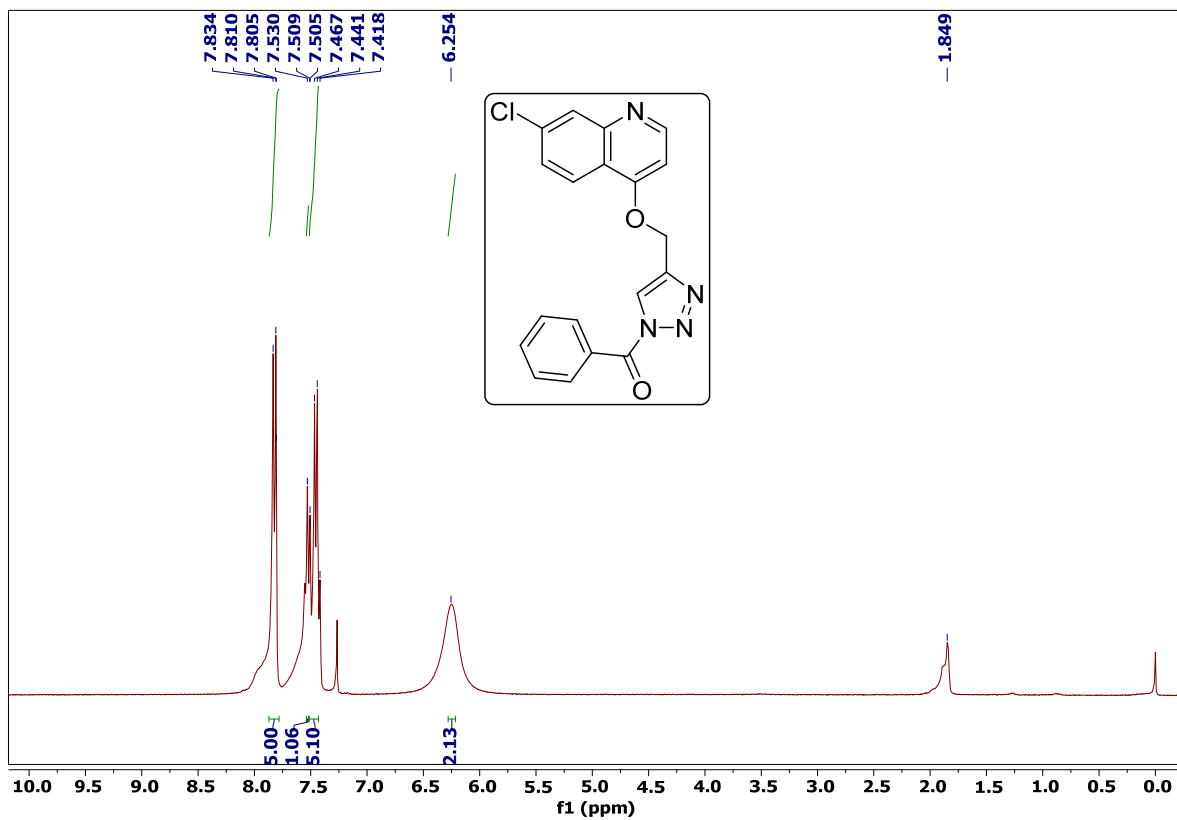

Figure S10: <sup>1</sup>H NMR of Tr6

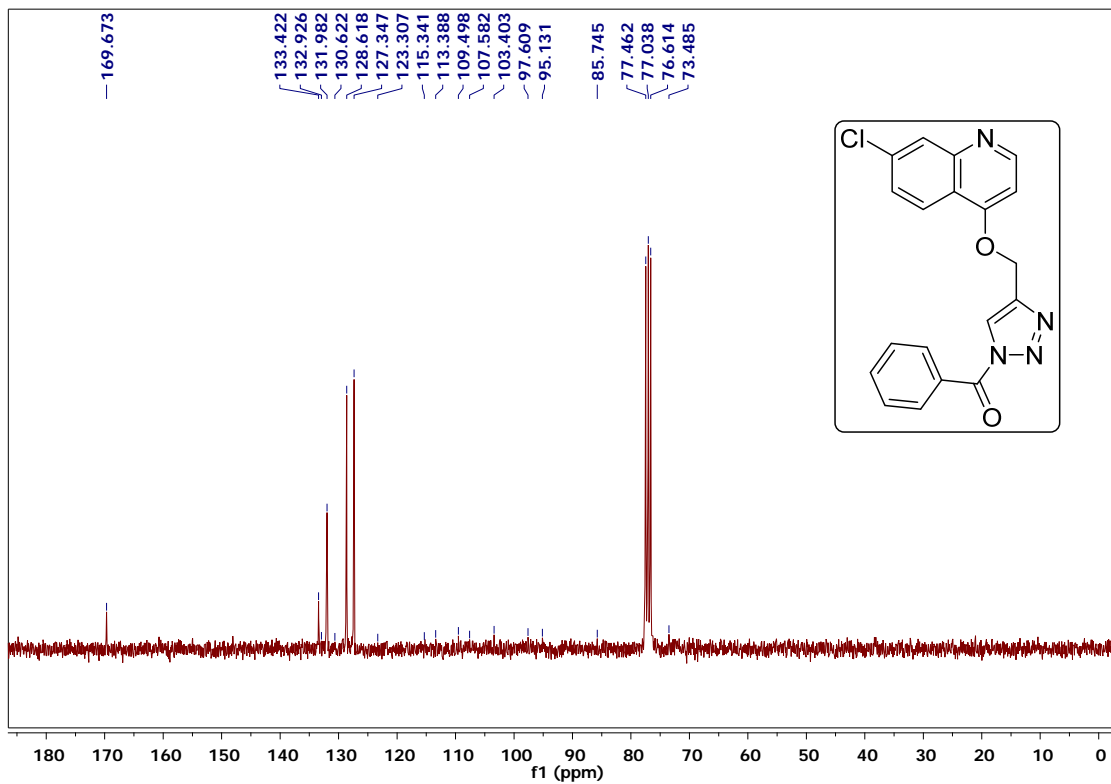

Figure S11: <sup>13</sup>C NMR of Tr6

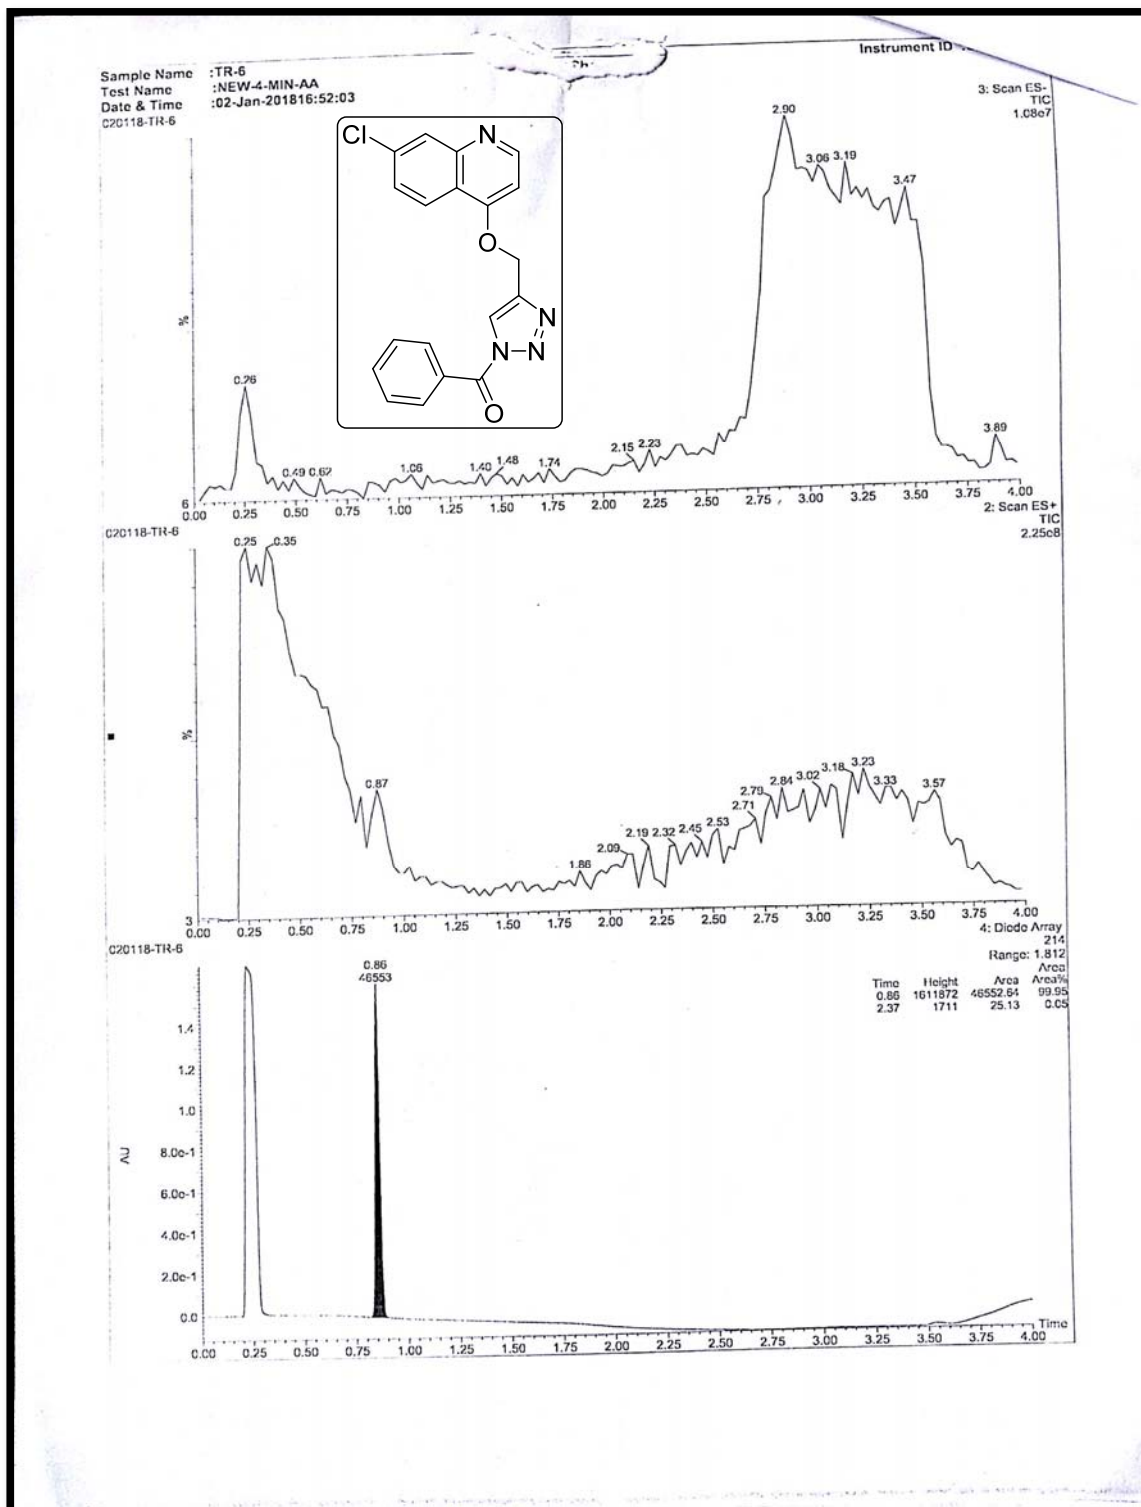

Figure S12a: Mass spectrum of Tr6

Sample Name :TR-6  
Test Name :NEW-4-MIN-AA  
Date & Time :02-Jan-2018  
C20118-TR-6 34 (0.877) Cm (33:35)

Instrument ID :UR

2: Scan ES+  
2.6267

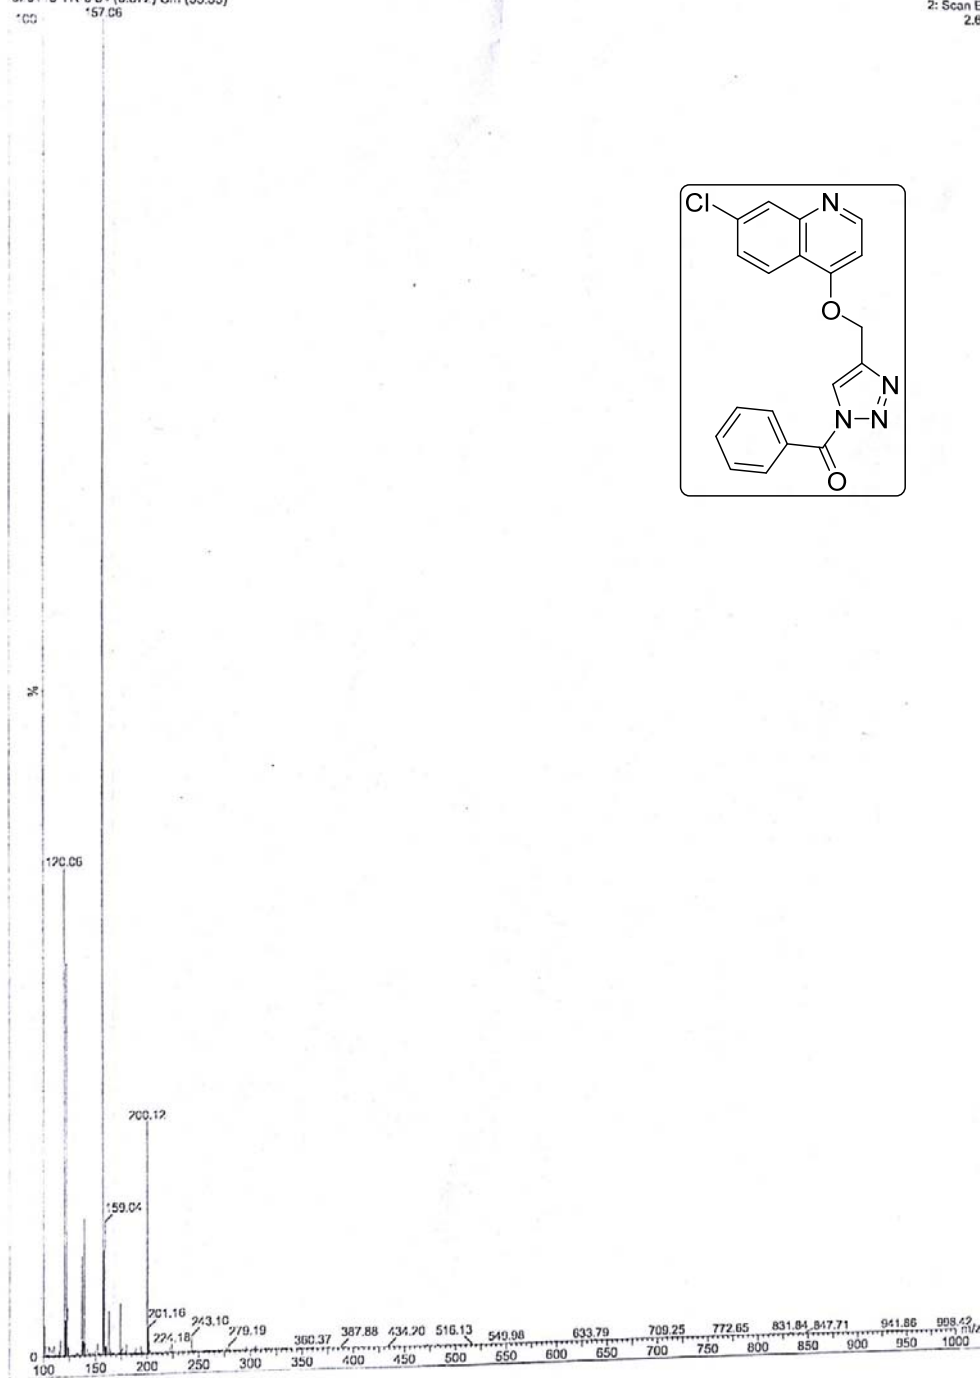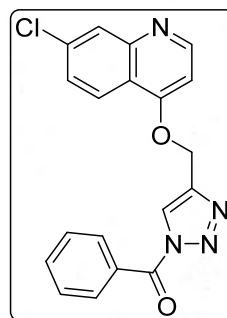

Figure S12b: Mass spectrum of Tr6

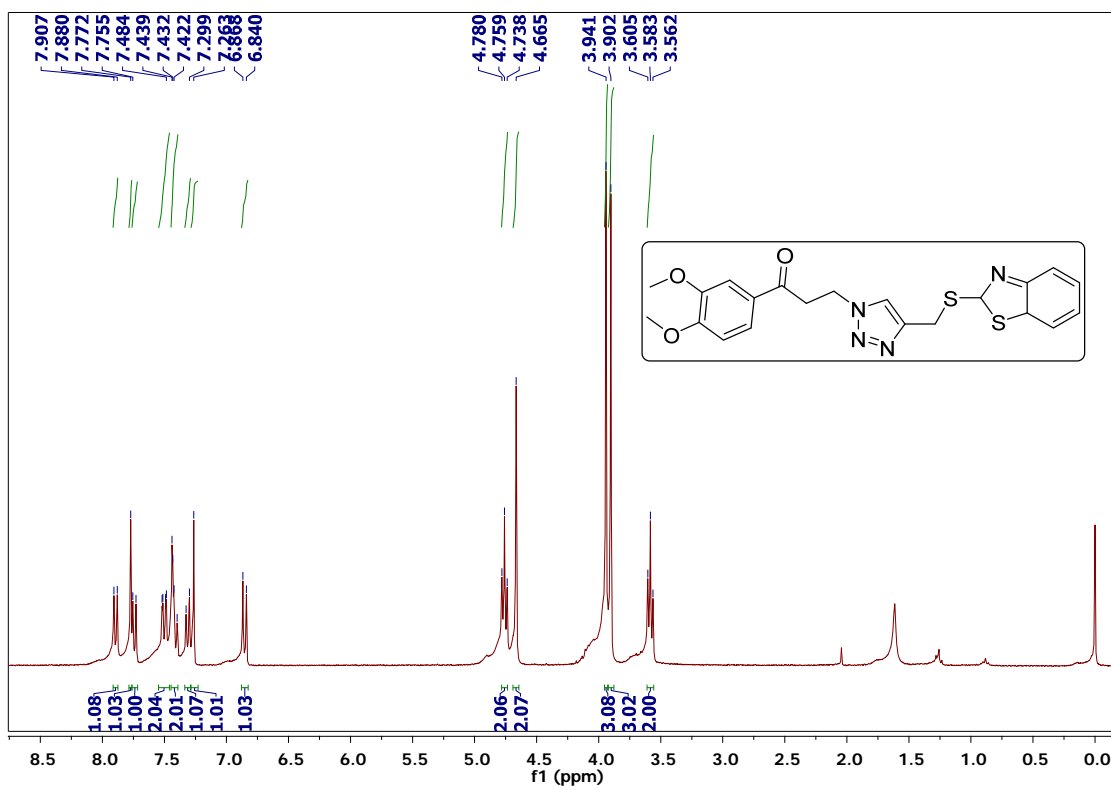

Figure S13: <sup>1</sup>H NMR of Tr7

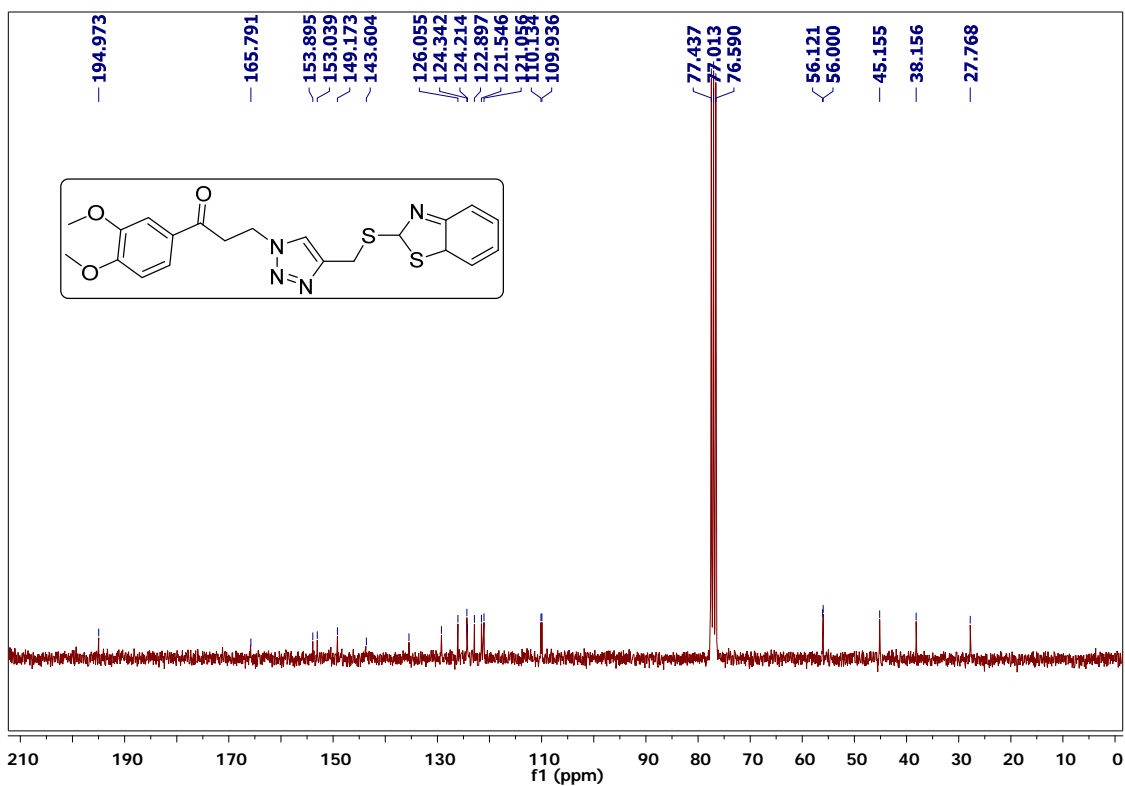

Figure S14:  $^{13}\text{C}$  NMR of Tr7

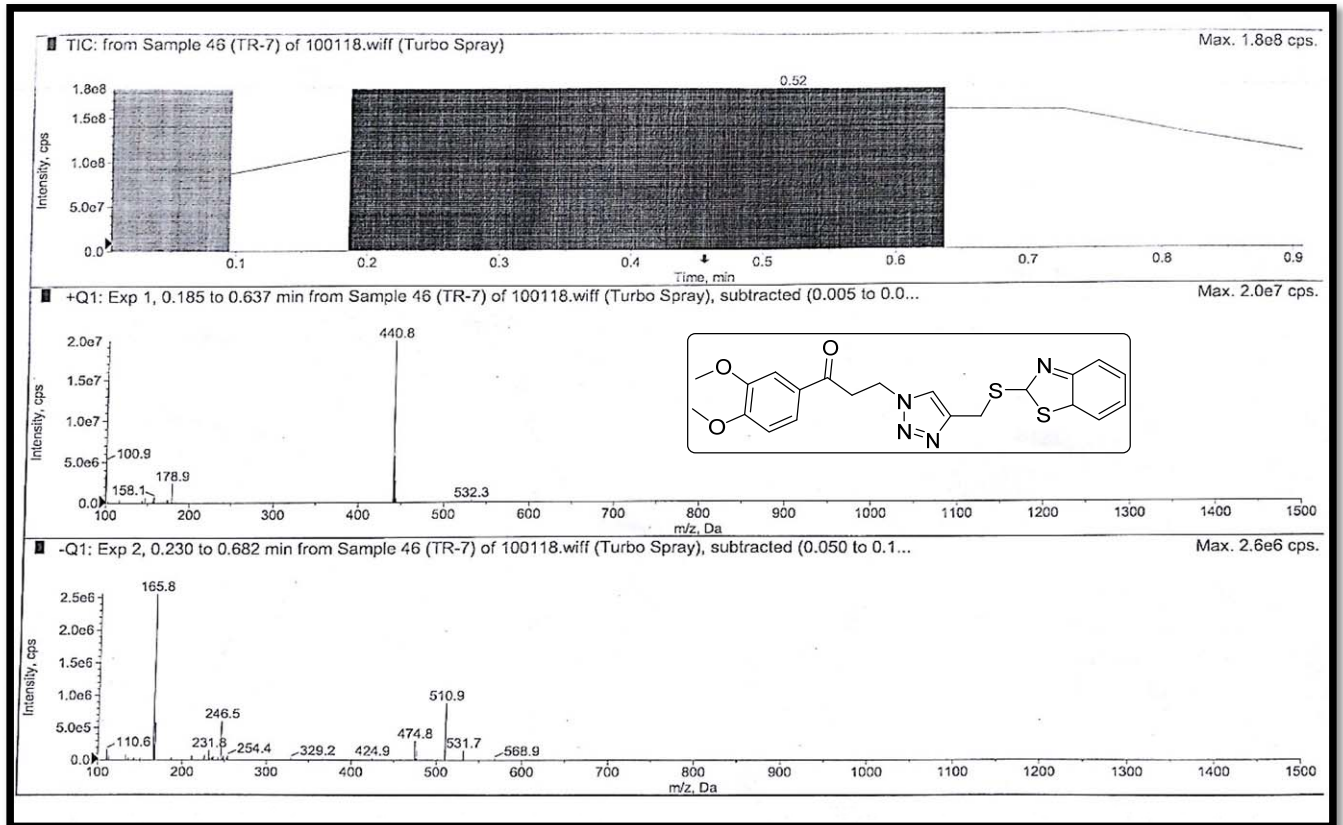

Figure S15: Mass spectrum of Tr7

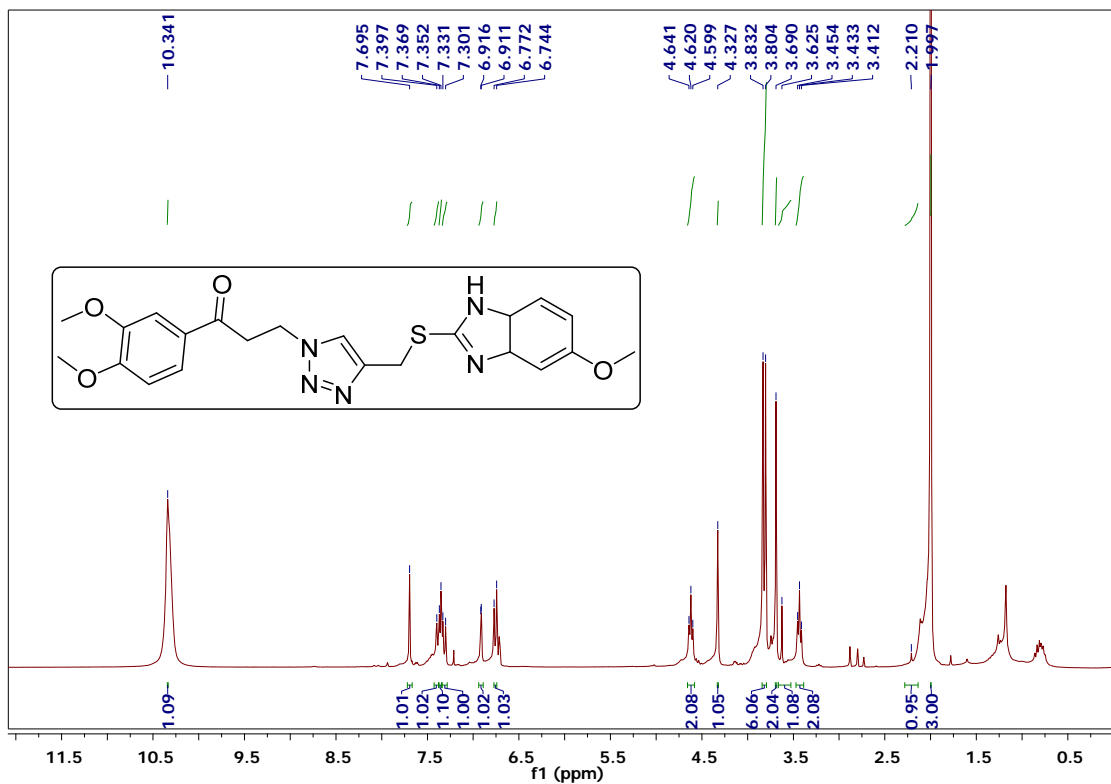

Figure S16:  $^1\text{H}$  NMR of Tr8

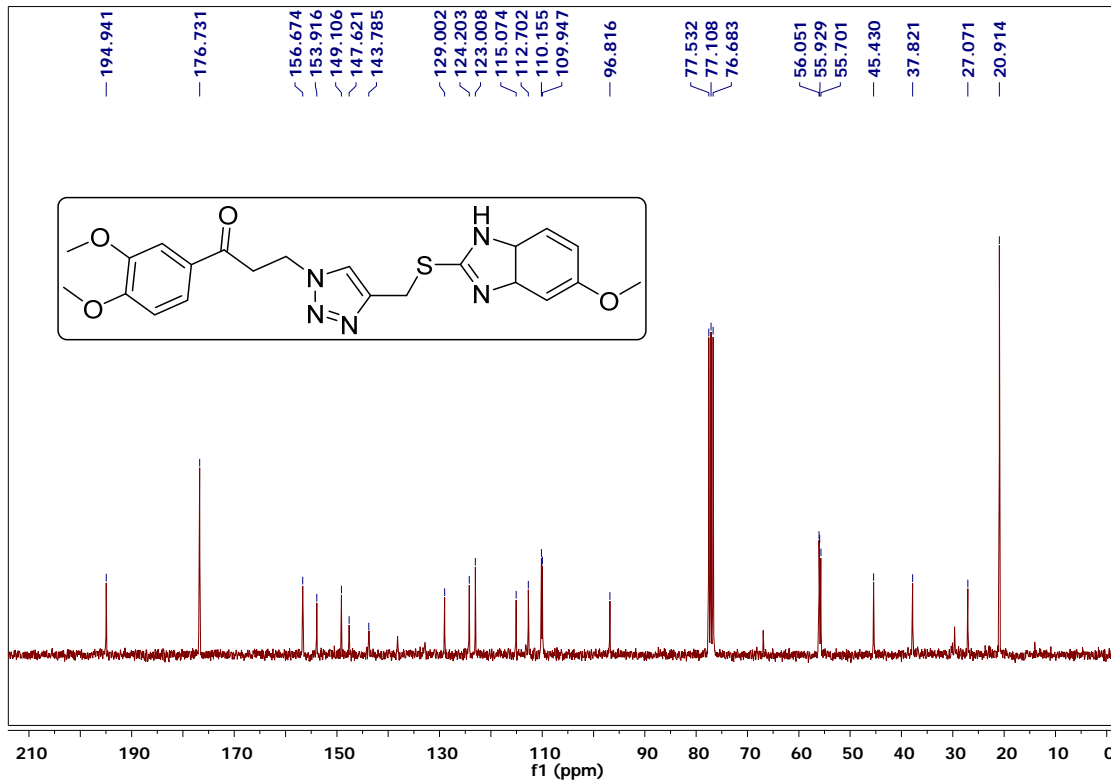

Figure S17:  $^{13}\text{C}$  NMR of Tr8

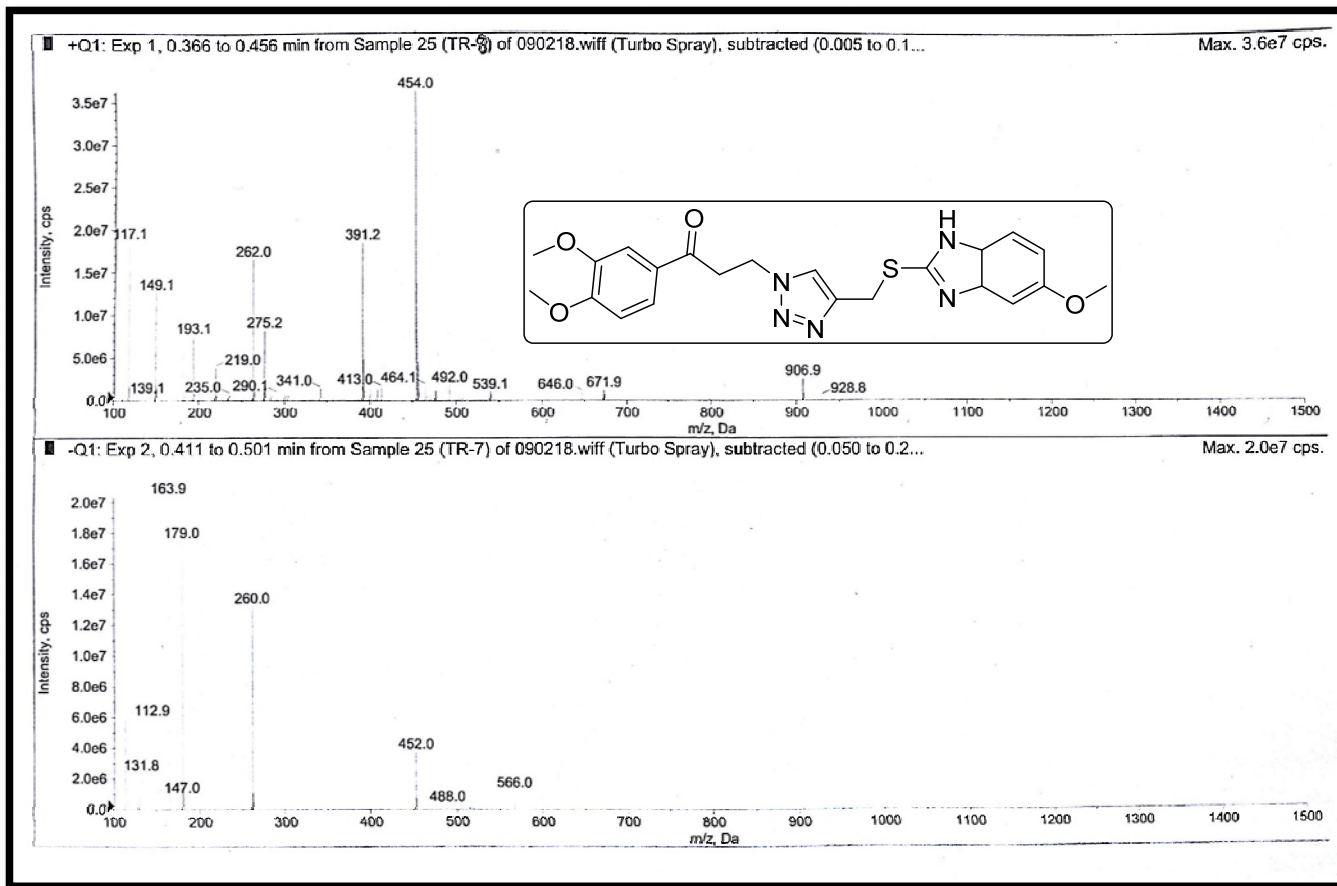

Figure S18: Mass spectrum of Tr8

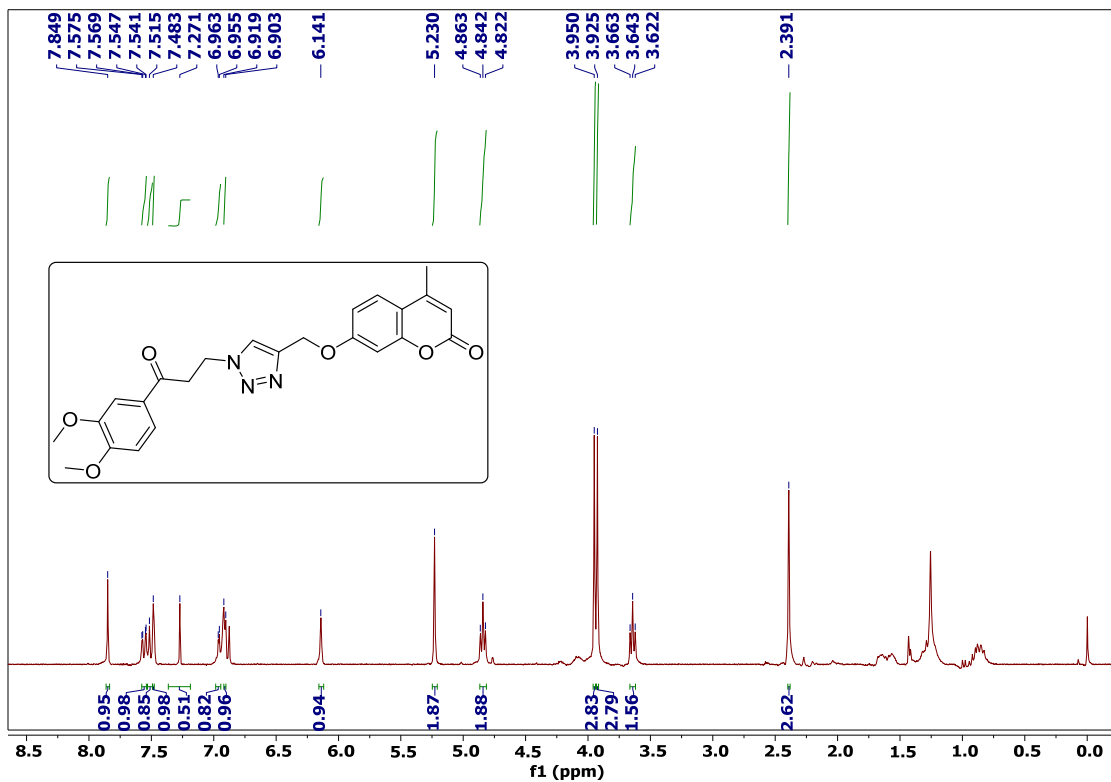

Figure S19: <sup>1</sup>H NMR of Tr9

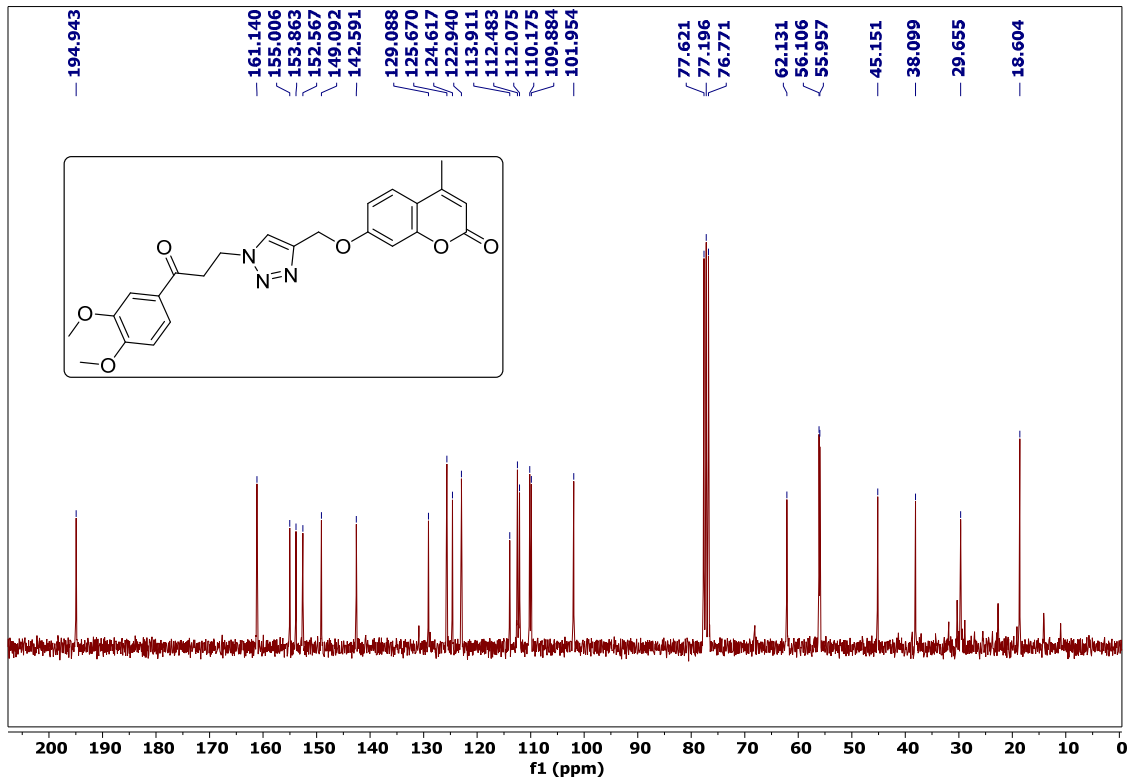

Figure S20: <sup>13</sup>C NMR of Tr9



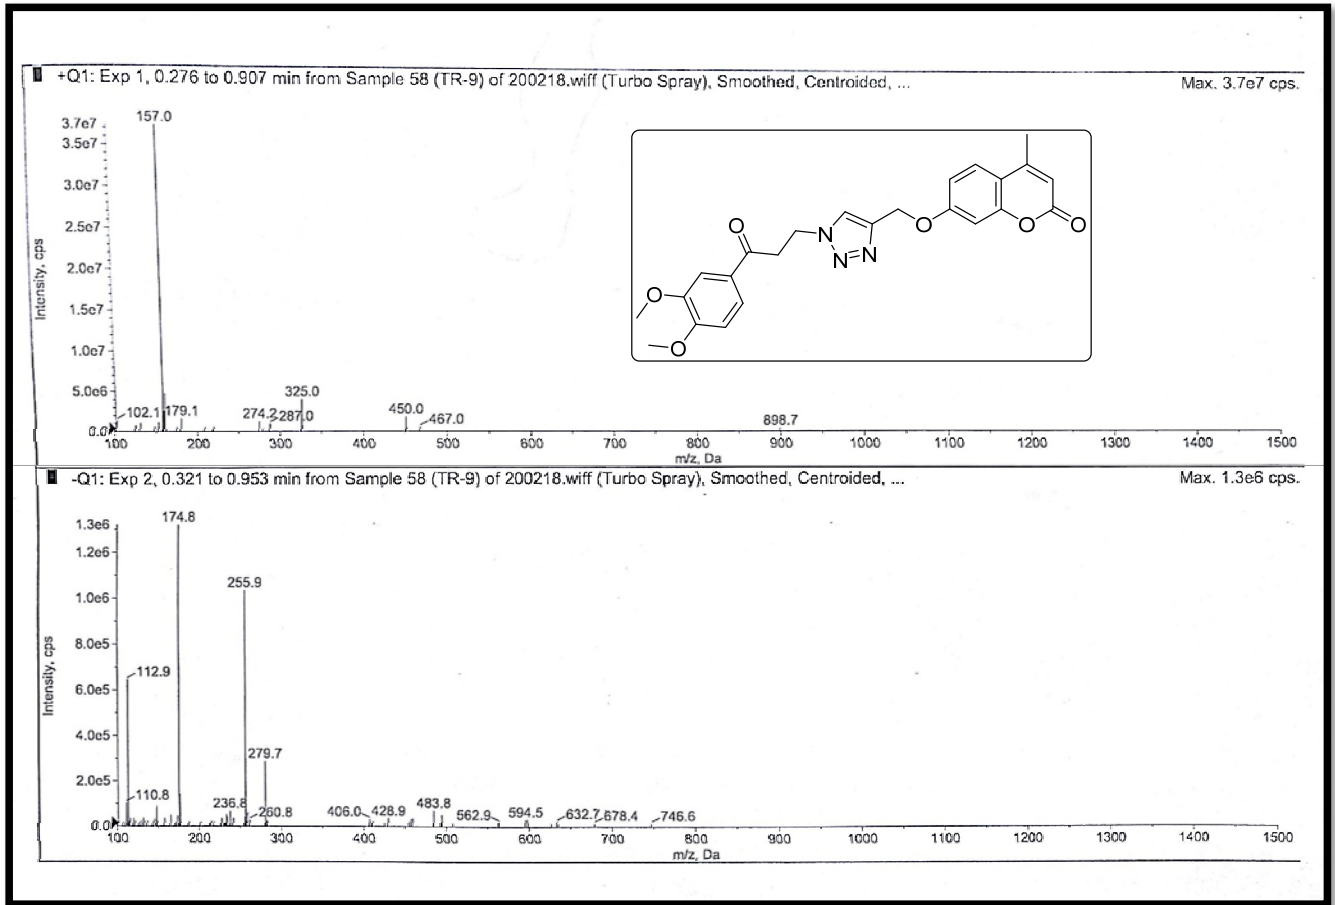

Figure S21: Mass spectrum of Tr9

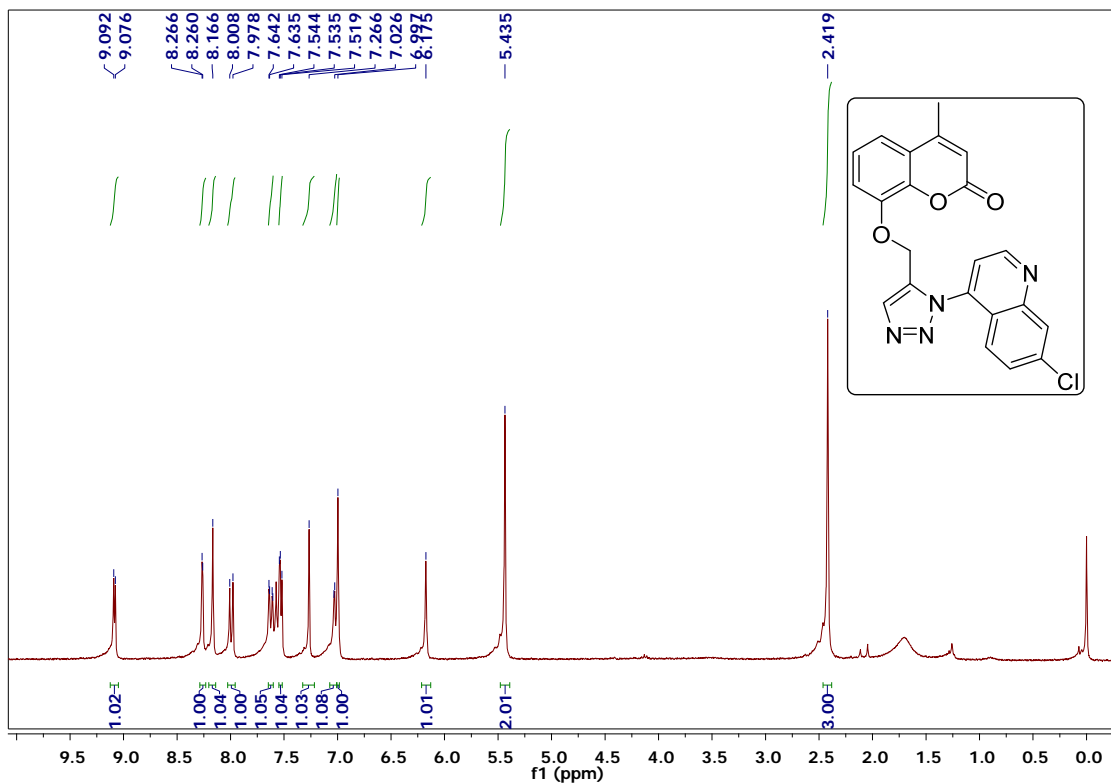

Figure S22: <sup>1</sup>H NMR of Tr10

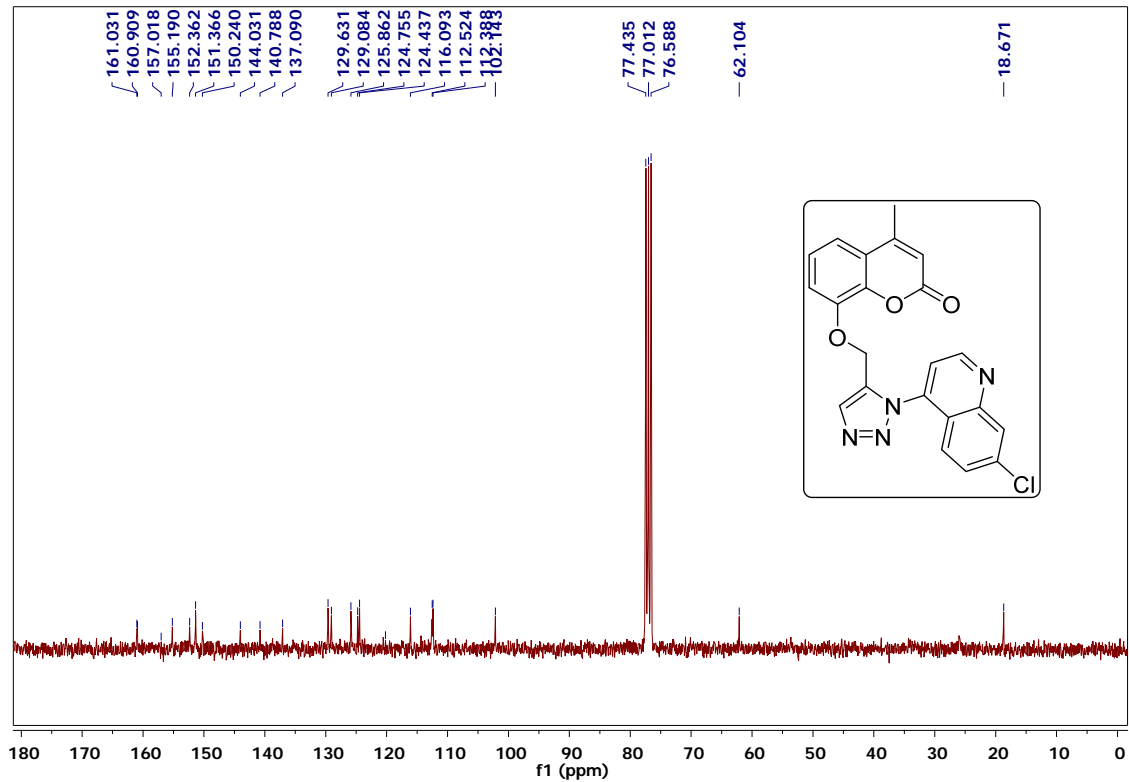

Figure S23: <sup>13</sup>C NMR of Tr10

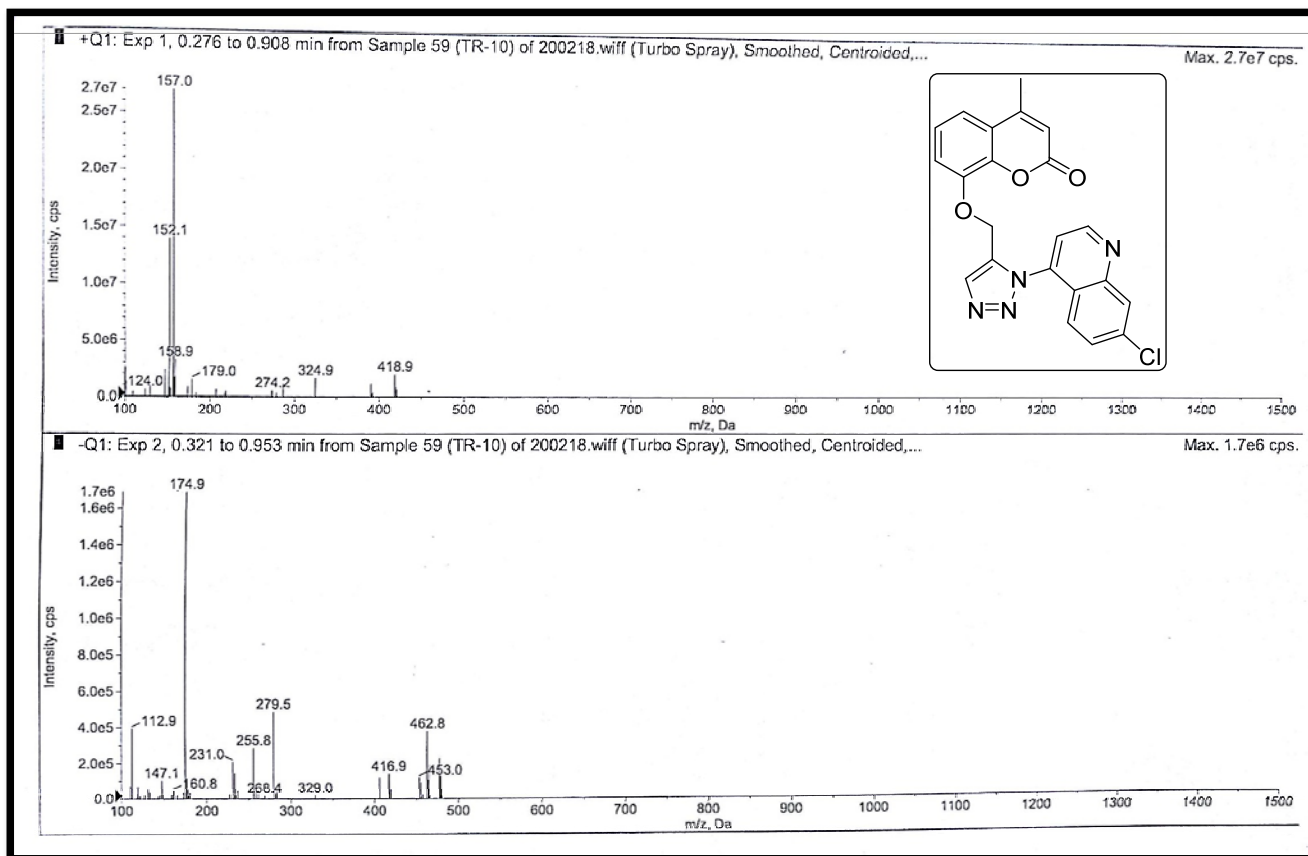

Figure S24: Mass spectrum of Tr10

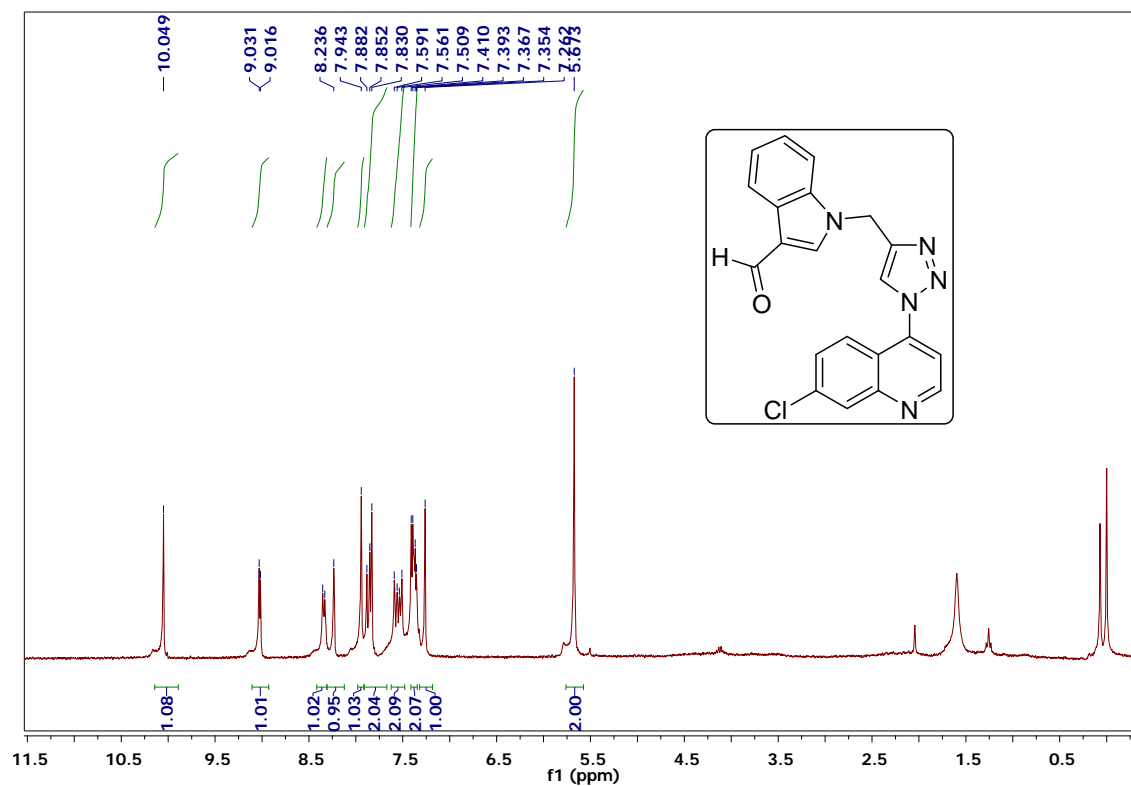

Figure S25:  $^1\text{H}$  NMR of Tr11

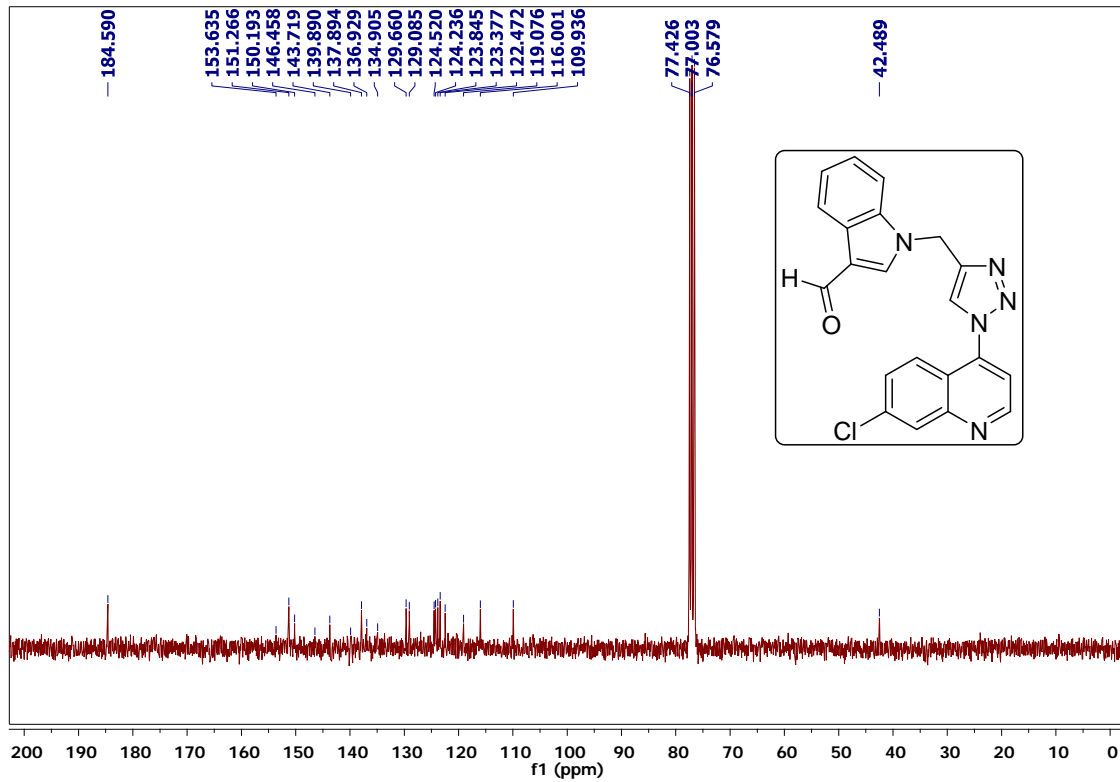

Figure S26:  $^{13}\text{C}$  NMR of Tr11

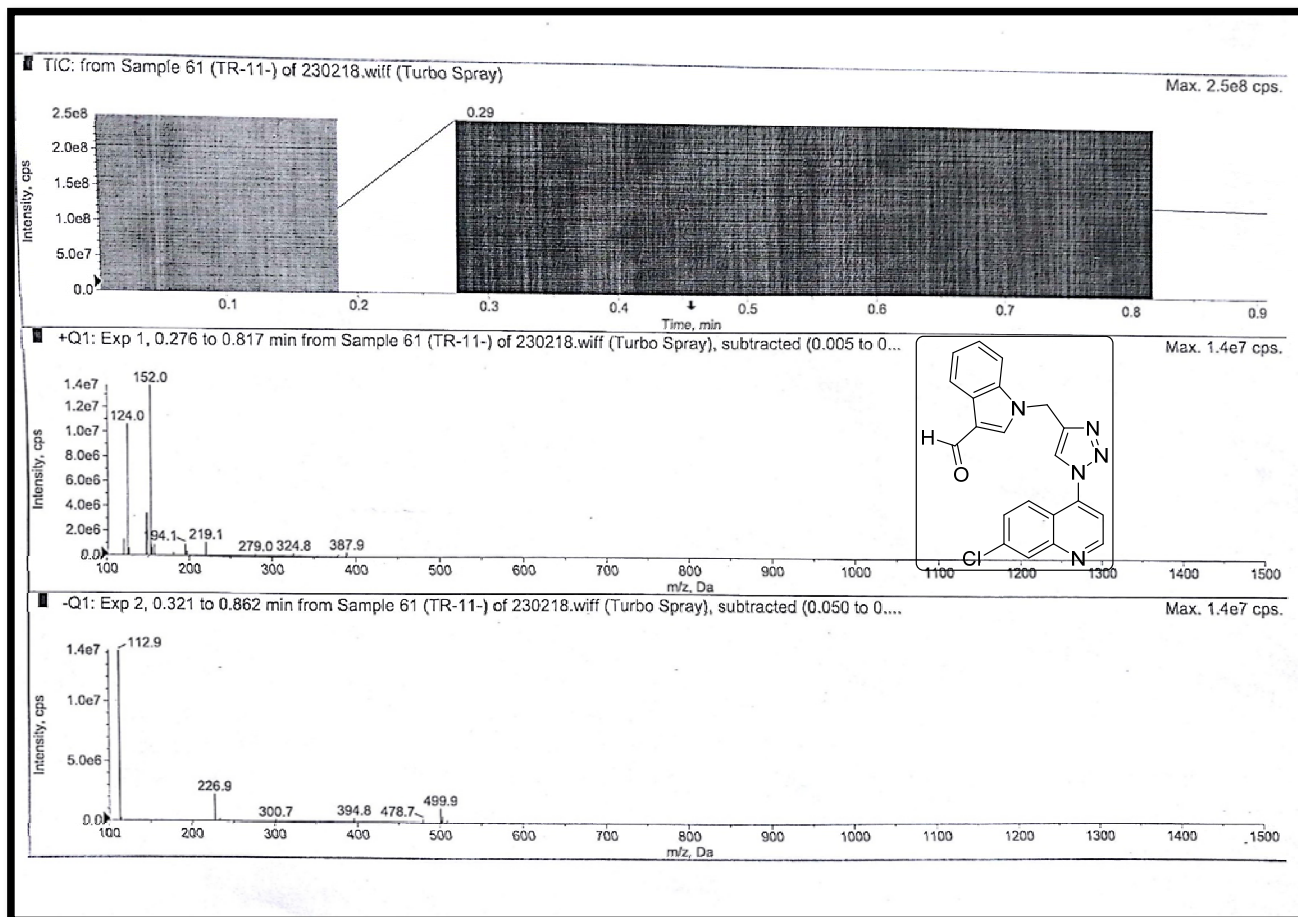

**Figure S27: Mass spectrum of Tr11**

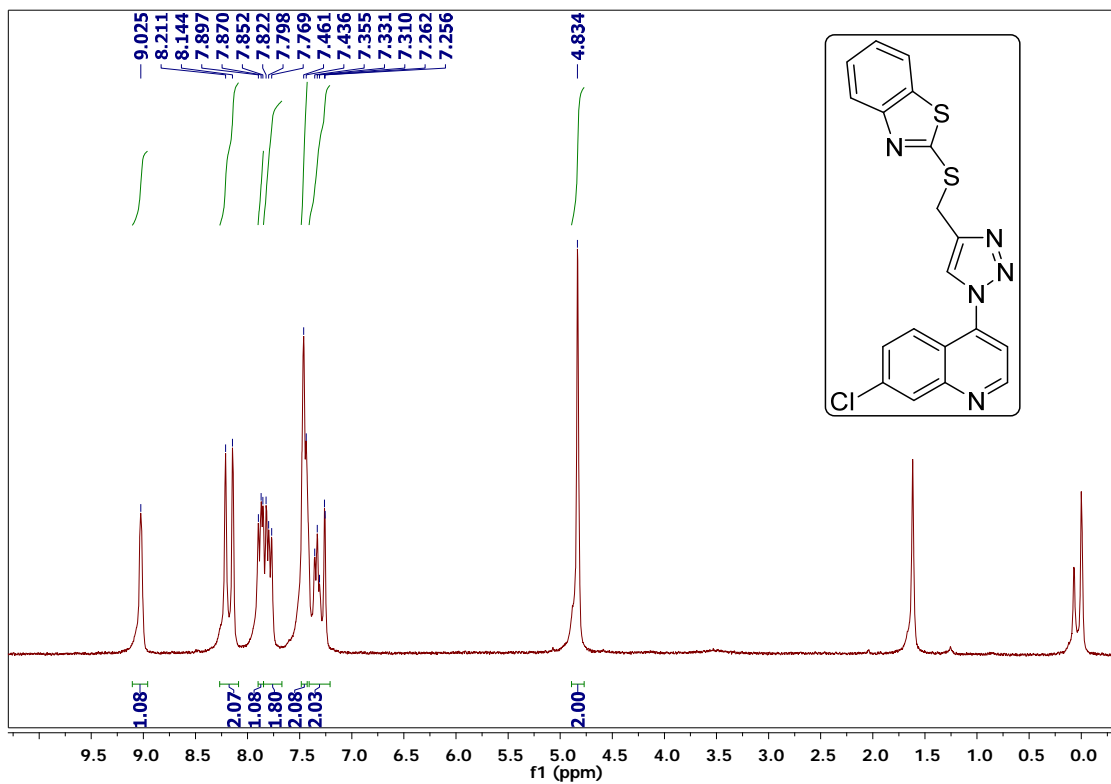

Figure S28:  $^1\text{H}$  NMR of Tr12

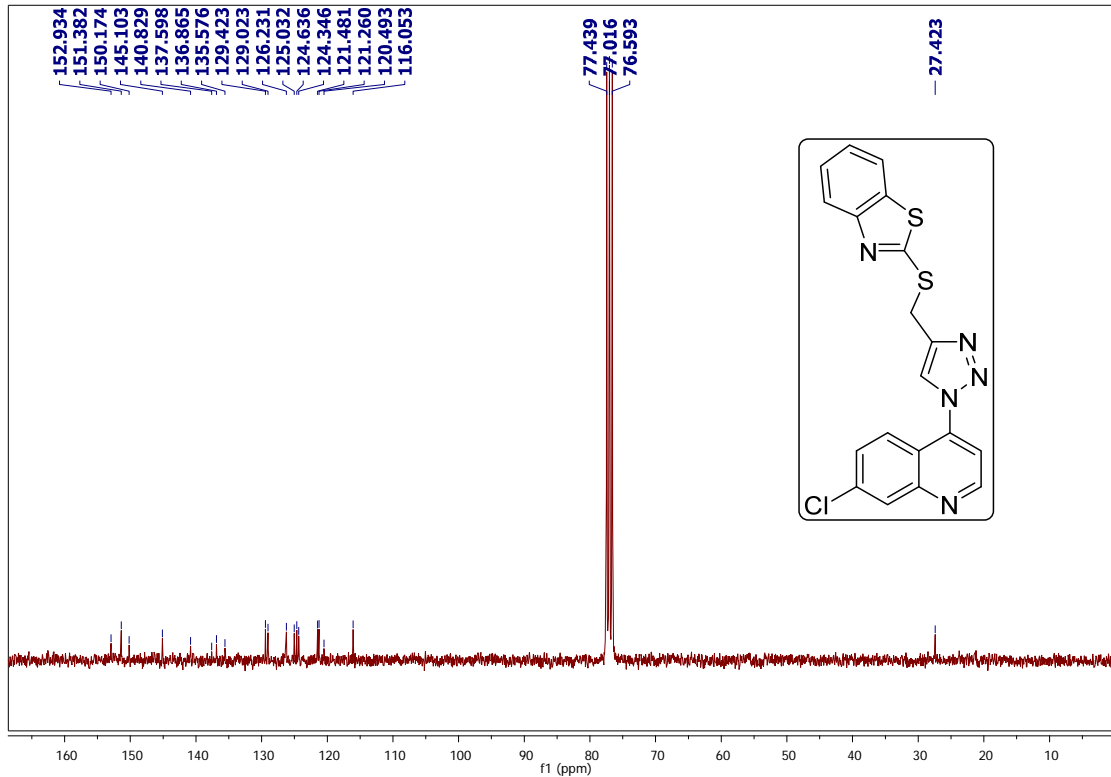

Figure S29:  $^{13}\text{C}$  NMR of Tr12

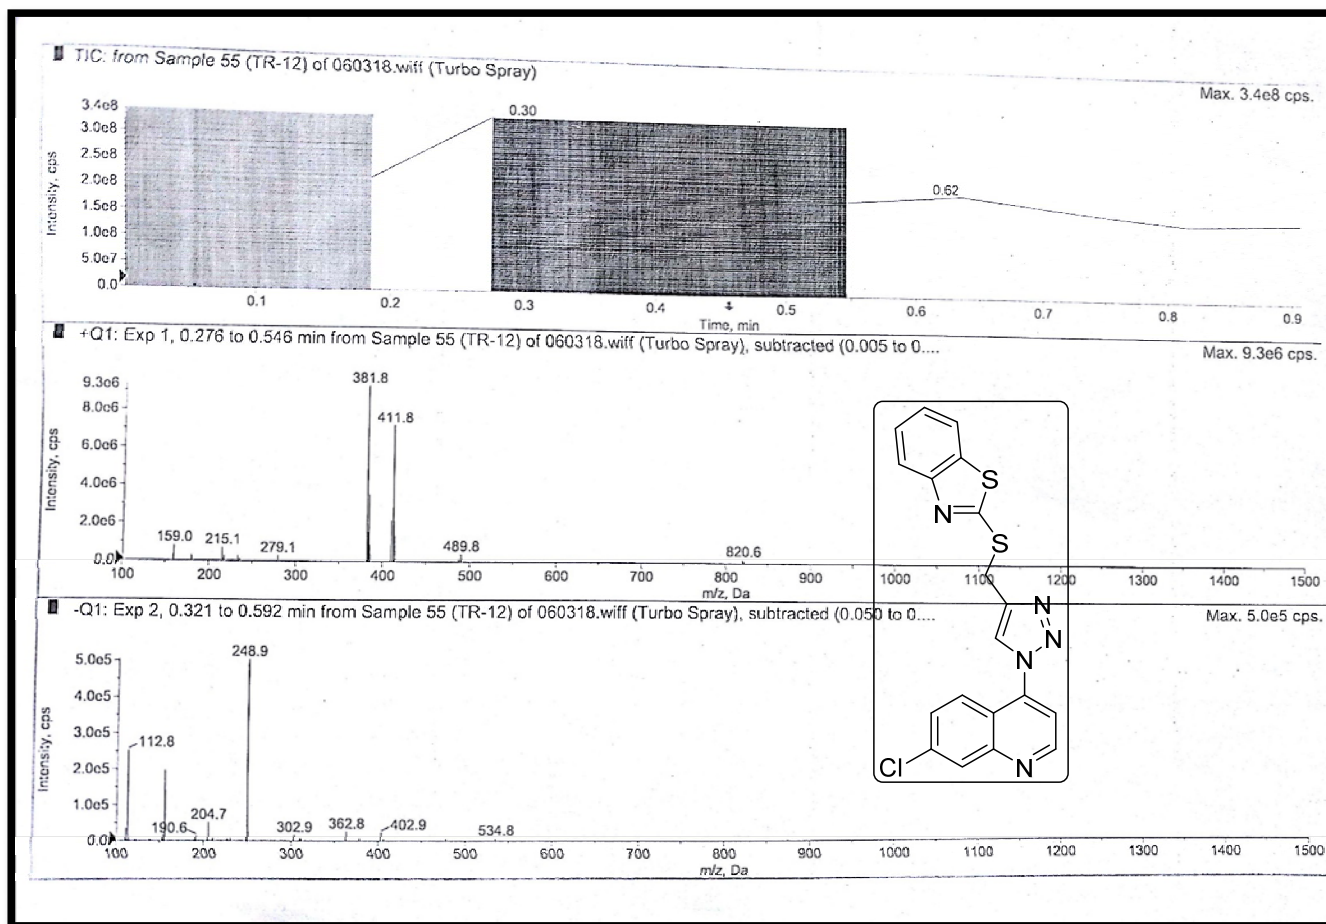

**Figure S30: Mass spectrum of Tr12**

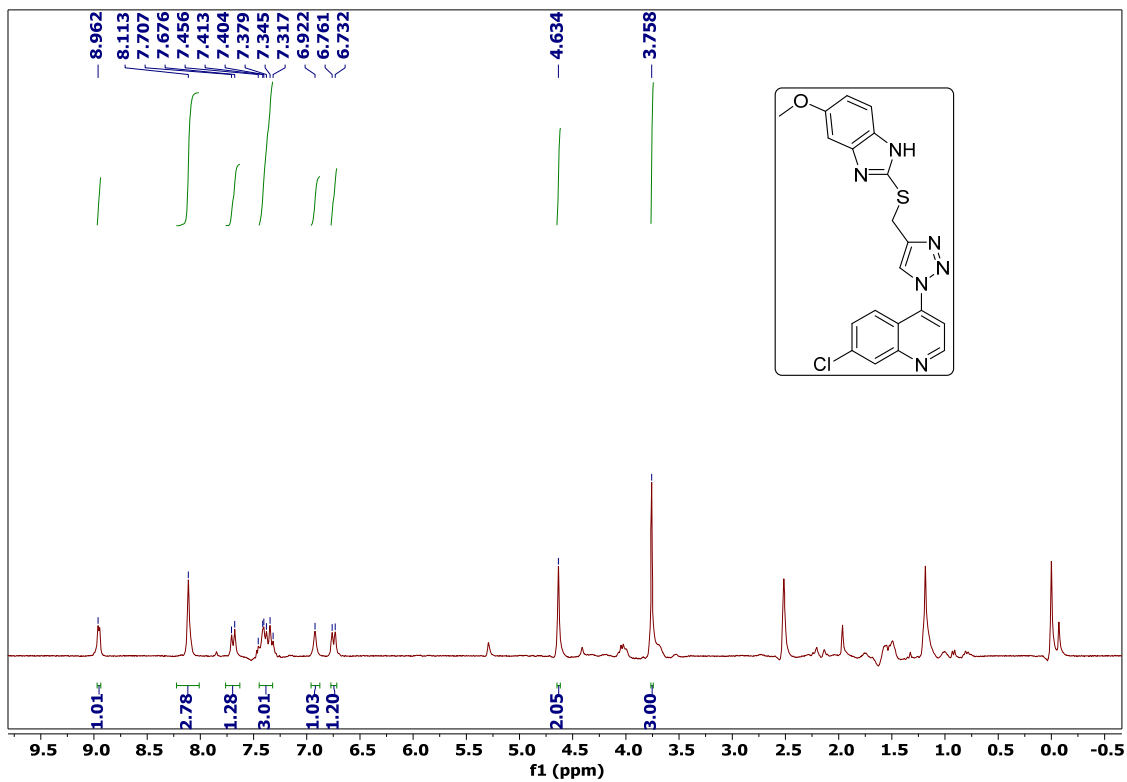

Figure S31: <sup>1</sup>H NMR of Tr13

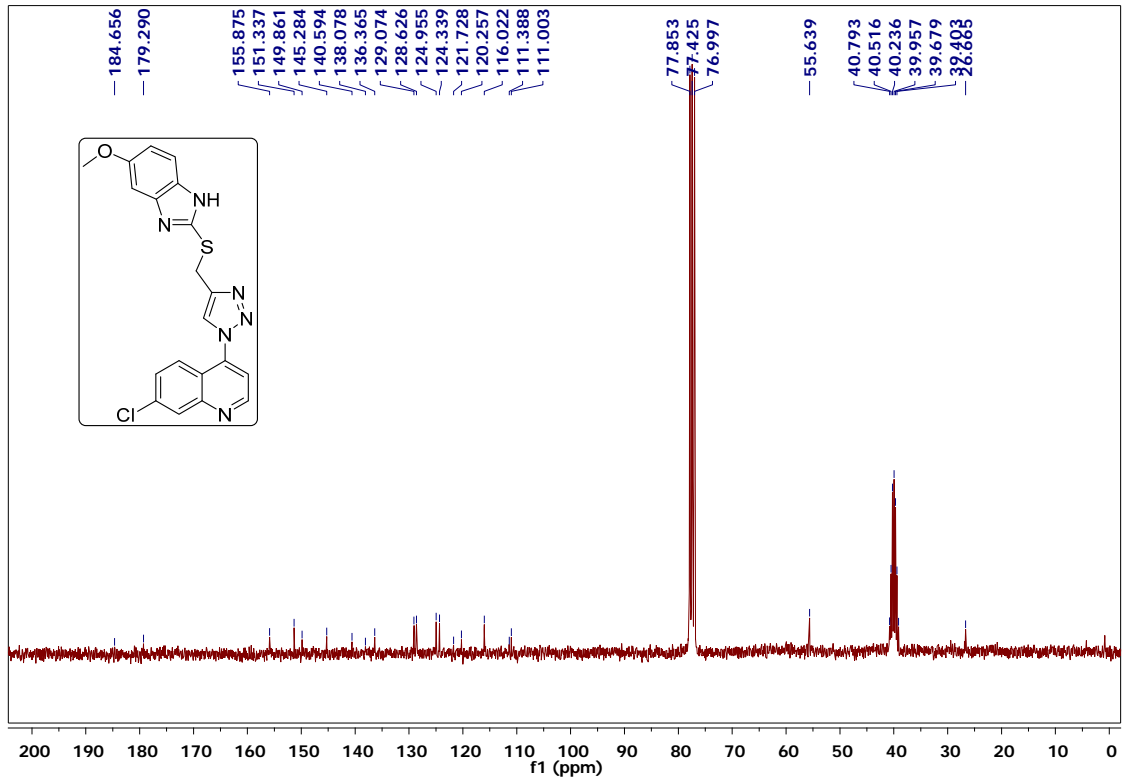

Figure S32: <sup>13</sup>C NMR of Tr13



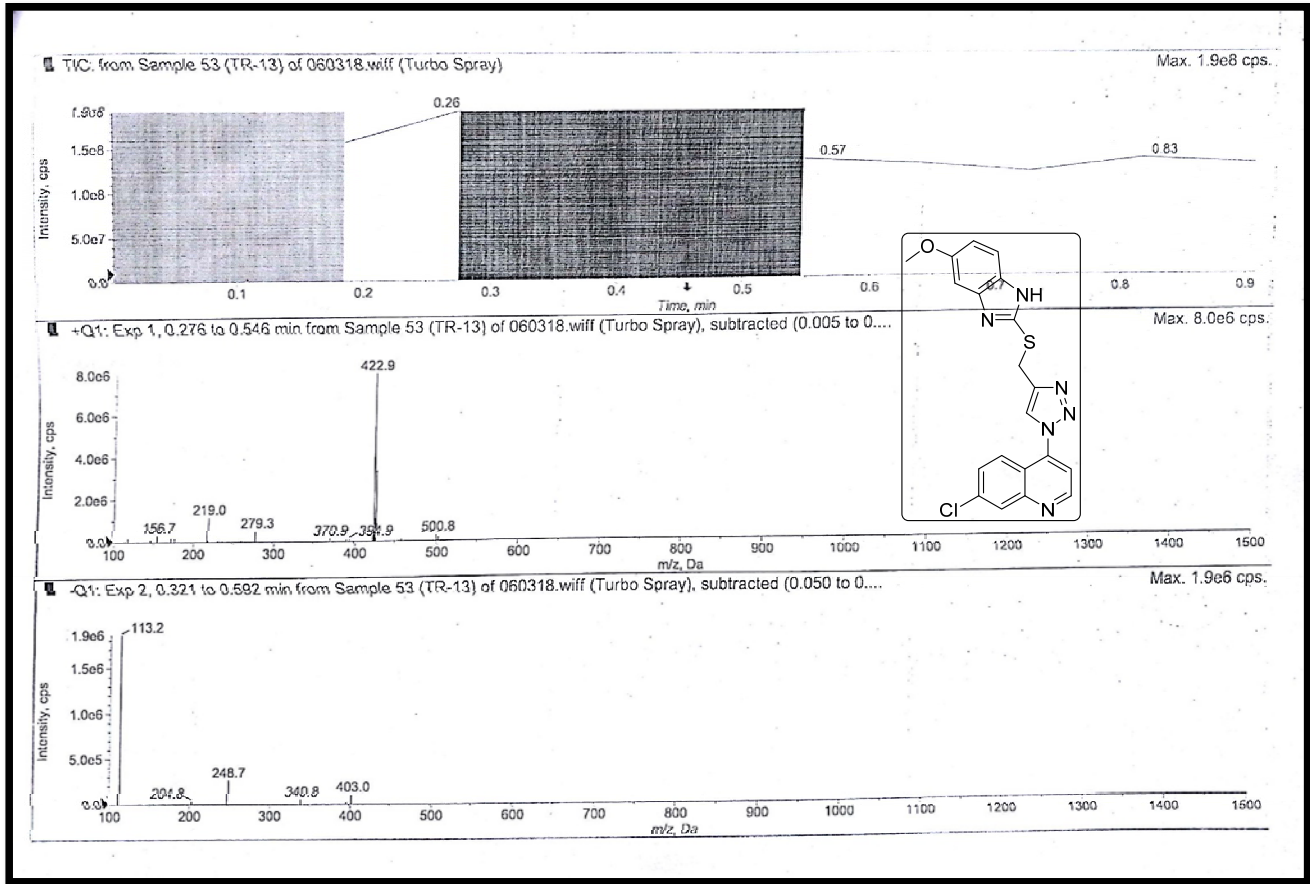

Figure S33: Mass spectrum of Tr13

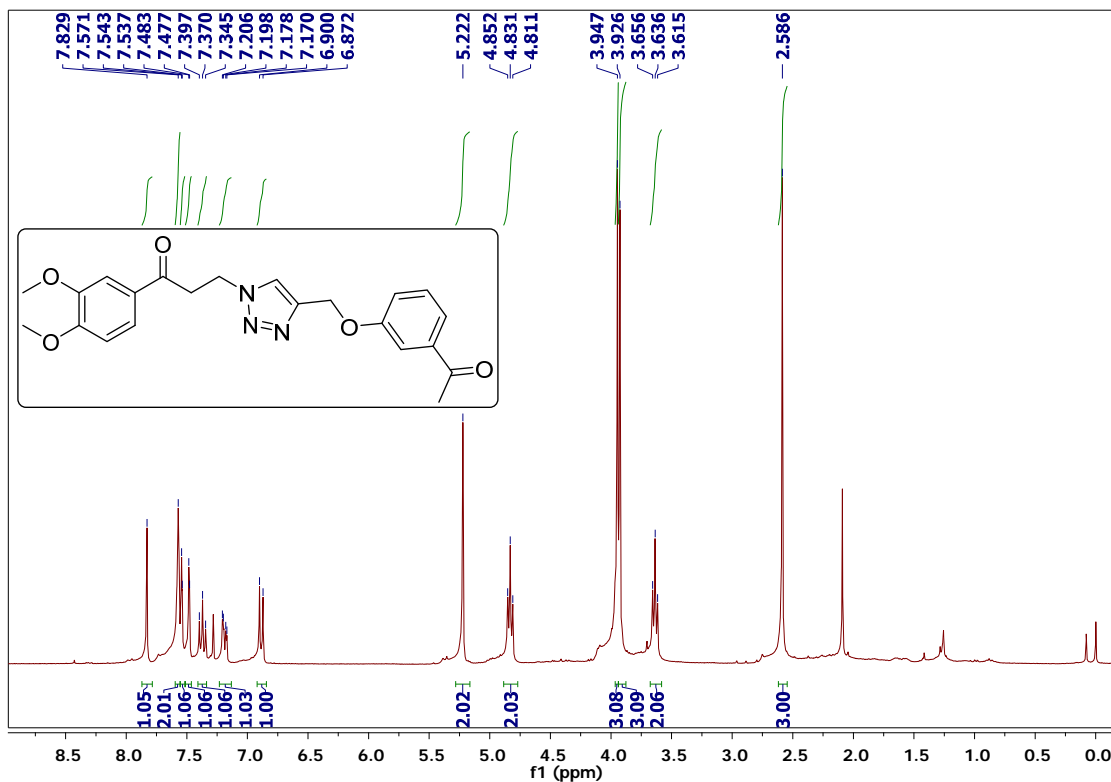

Figure S34:  $^1\text{H}$  NMR of Tr14

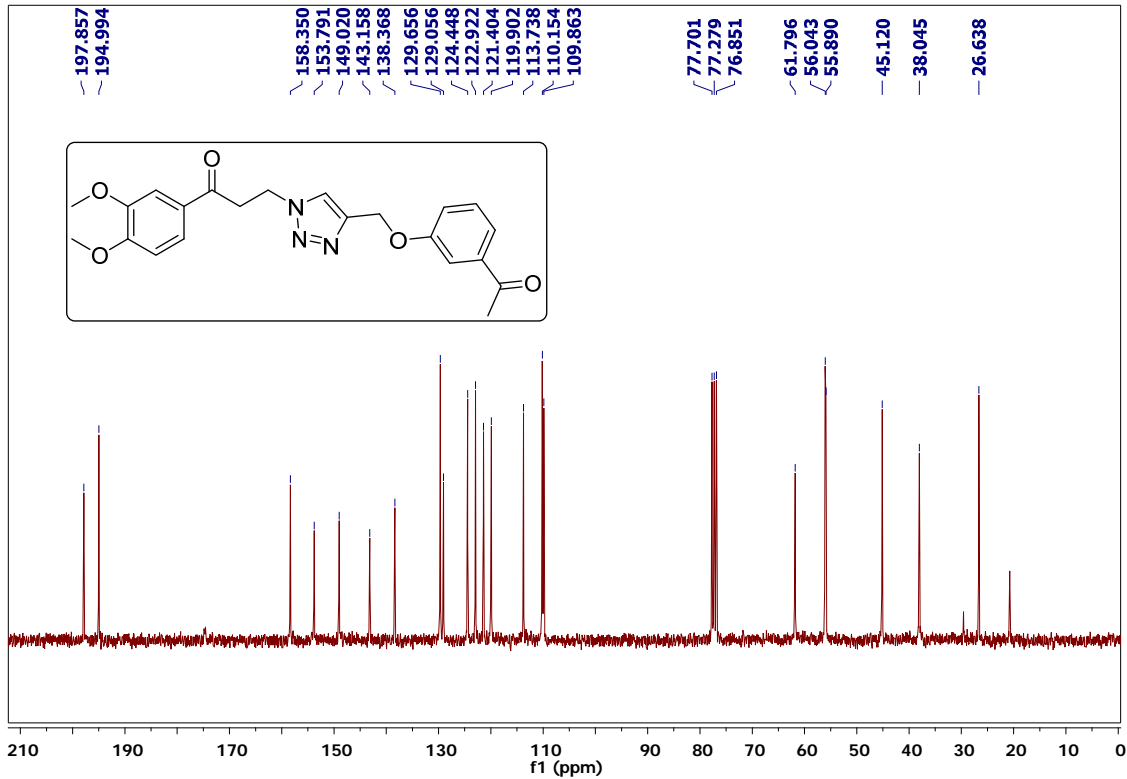

Figure S35:  $^{13}\text{C}$  NMR of Tr14

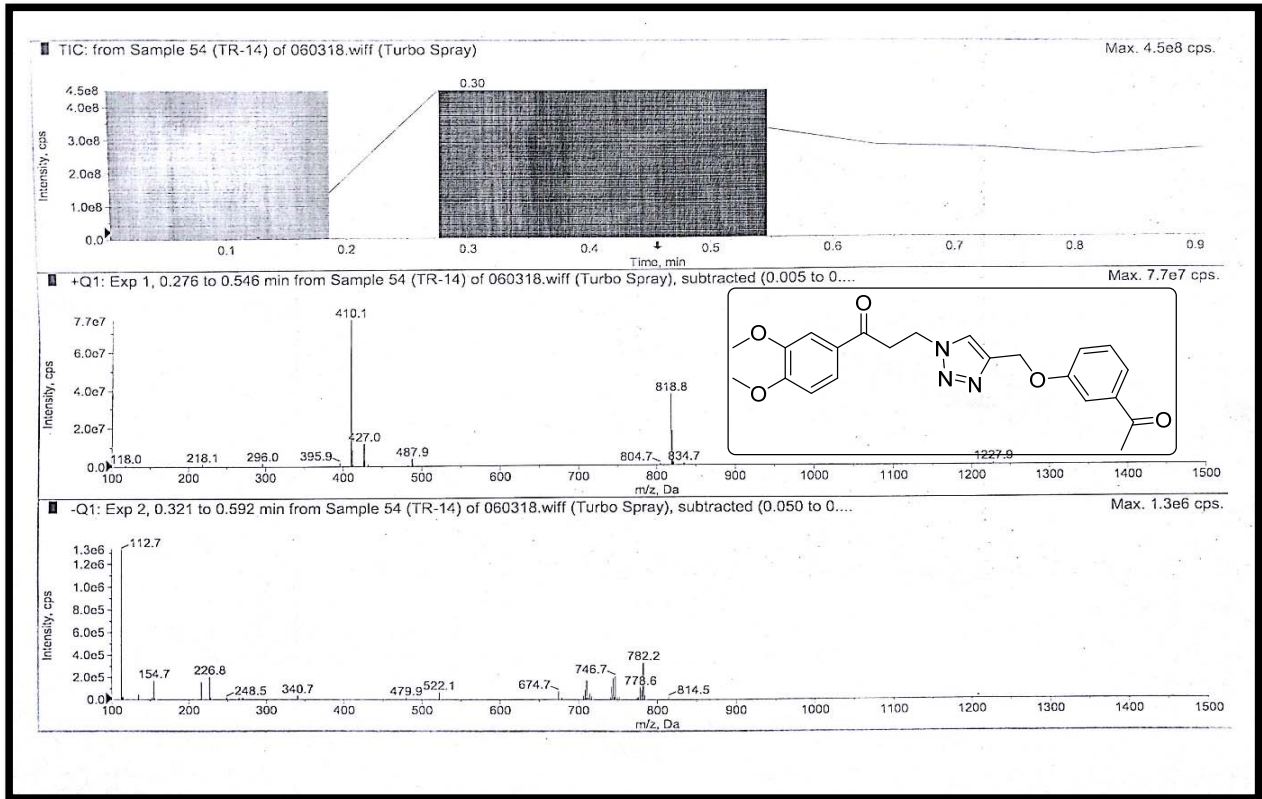

**Figure S36: Mass spectrum of Tr14**

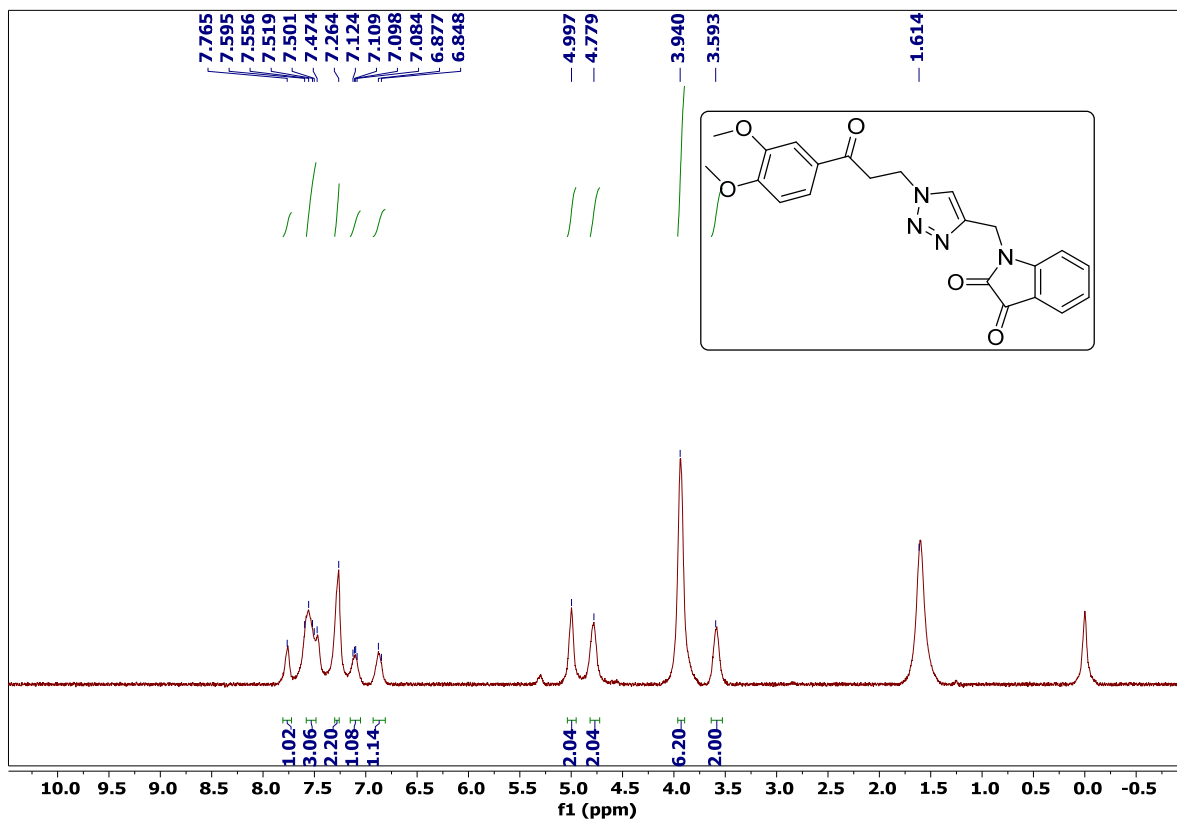

Figure S37: <sup>1</sup>H NMR of Tr15

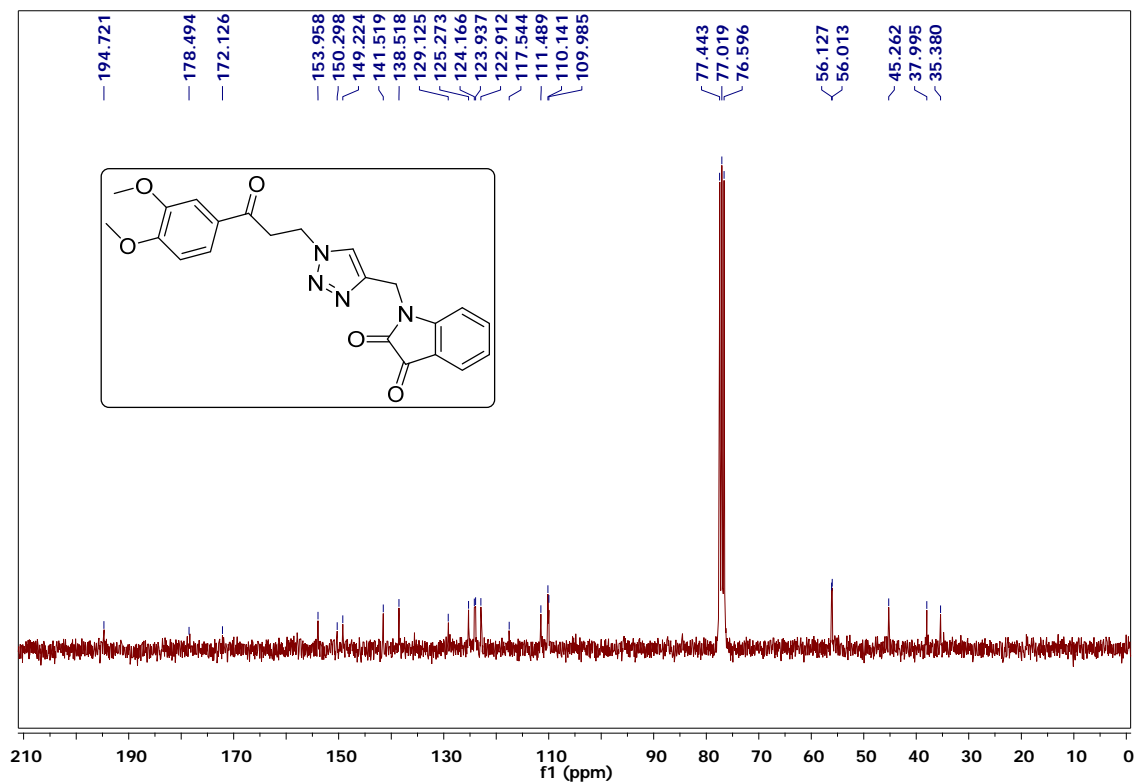

Figure S38:  $^{13}\text{C}$  NMR of Tr15

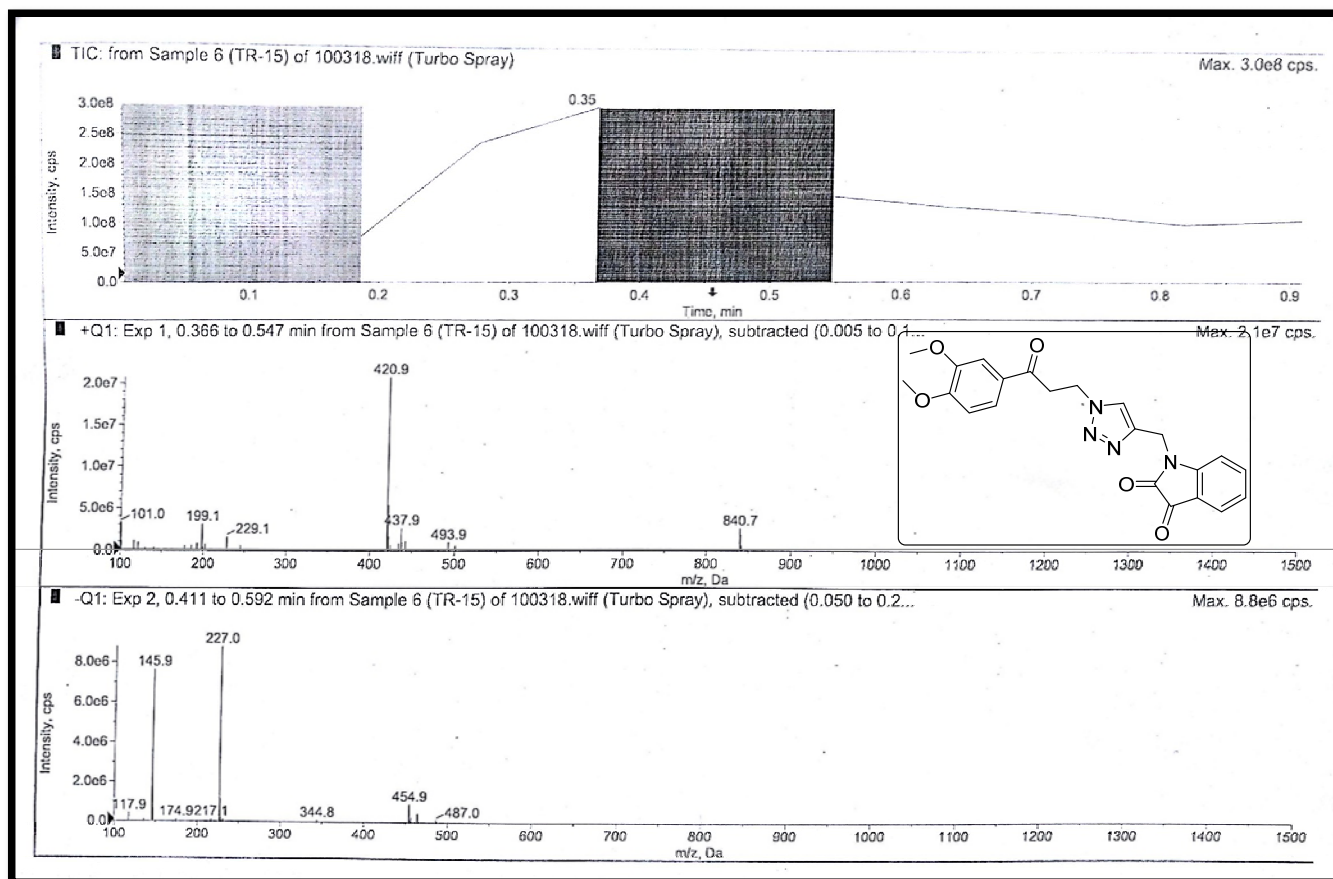

Figure S39: Mass spectrum of Tr15

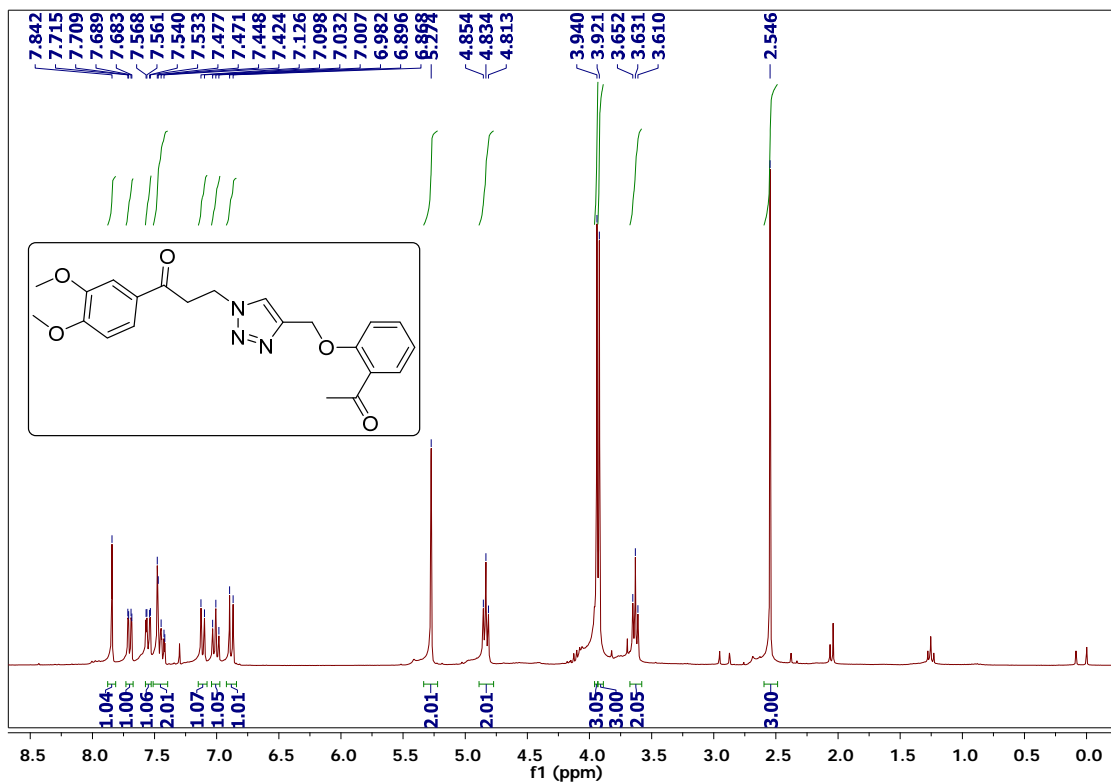

Figure S40:  $^1\text{H}$  NMR of Tr16

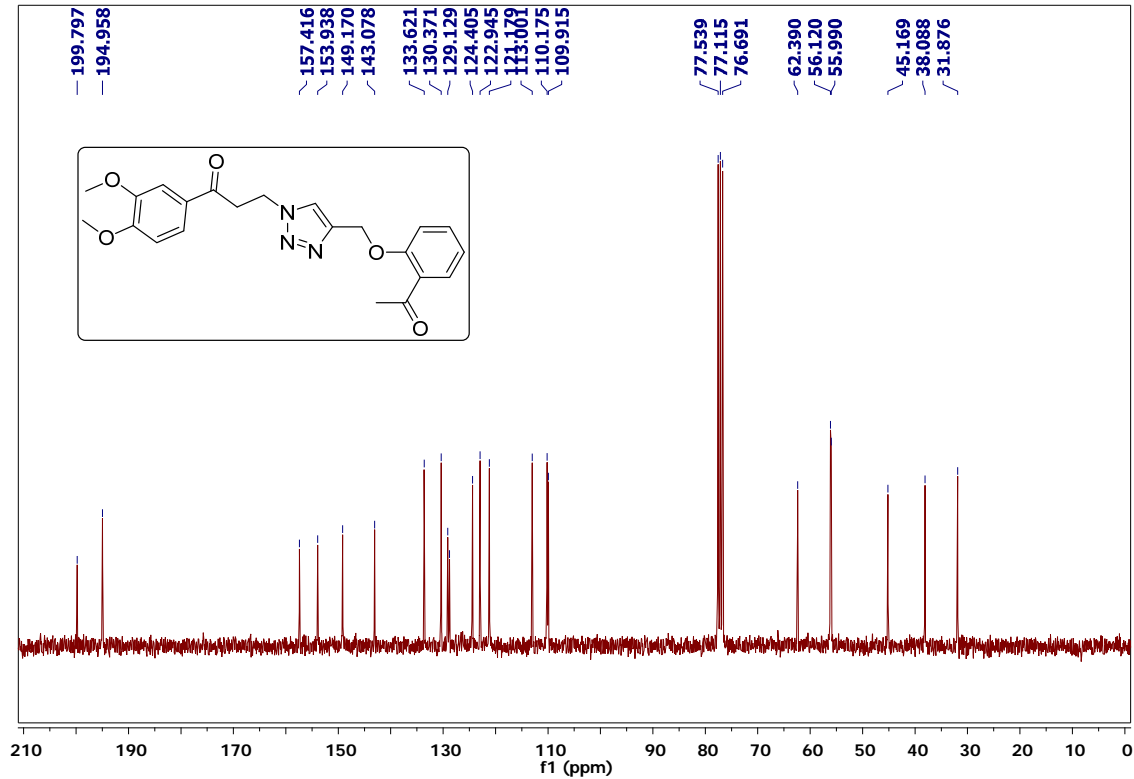

Figure S41:  $^{13}\text{C}$  NMR of Tr16

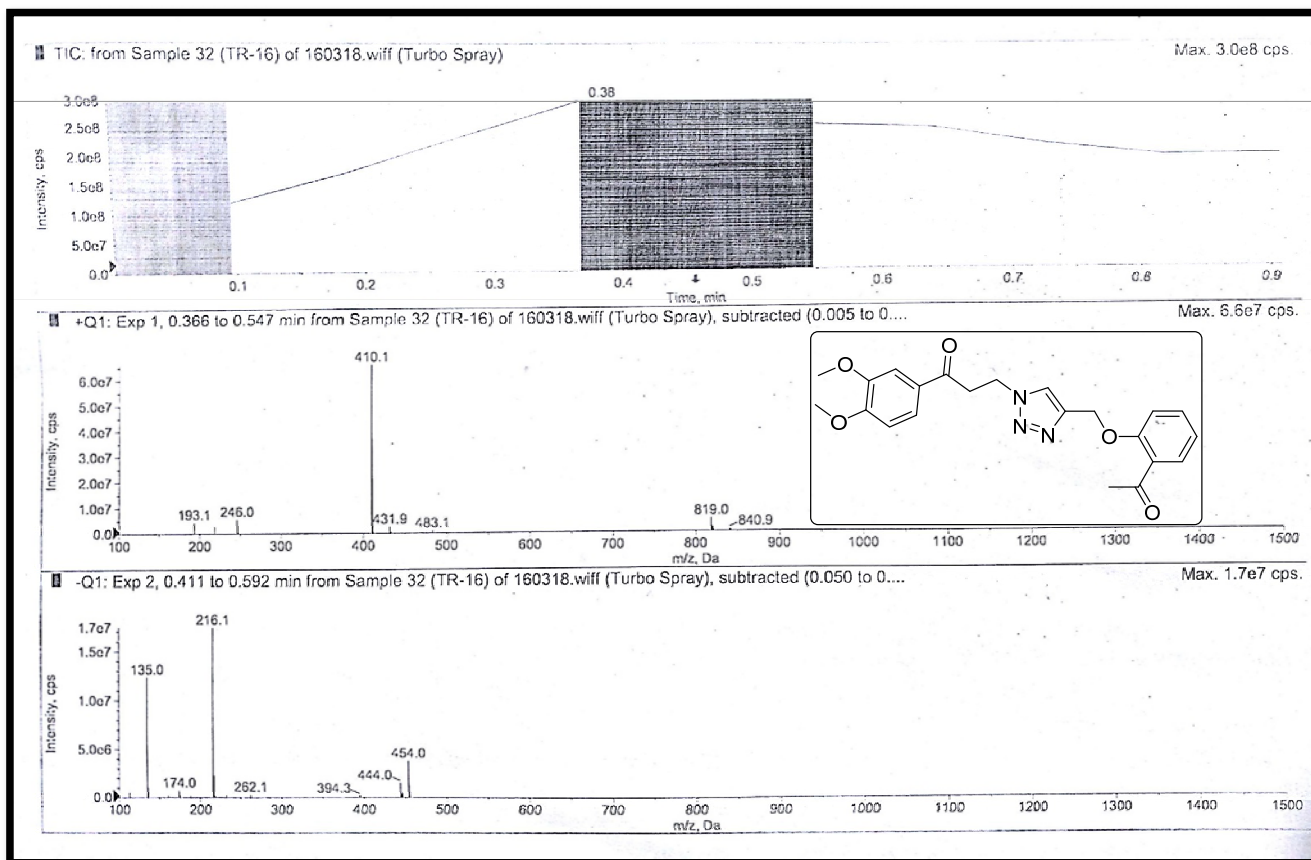

Figure S42: Mass spectrum of Tr16

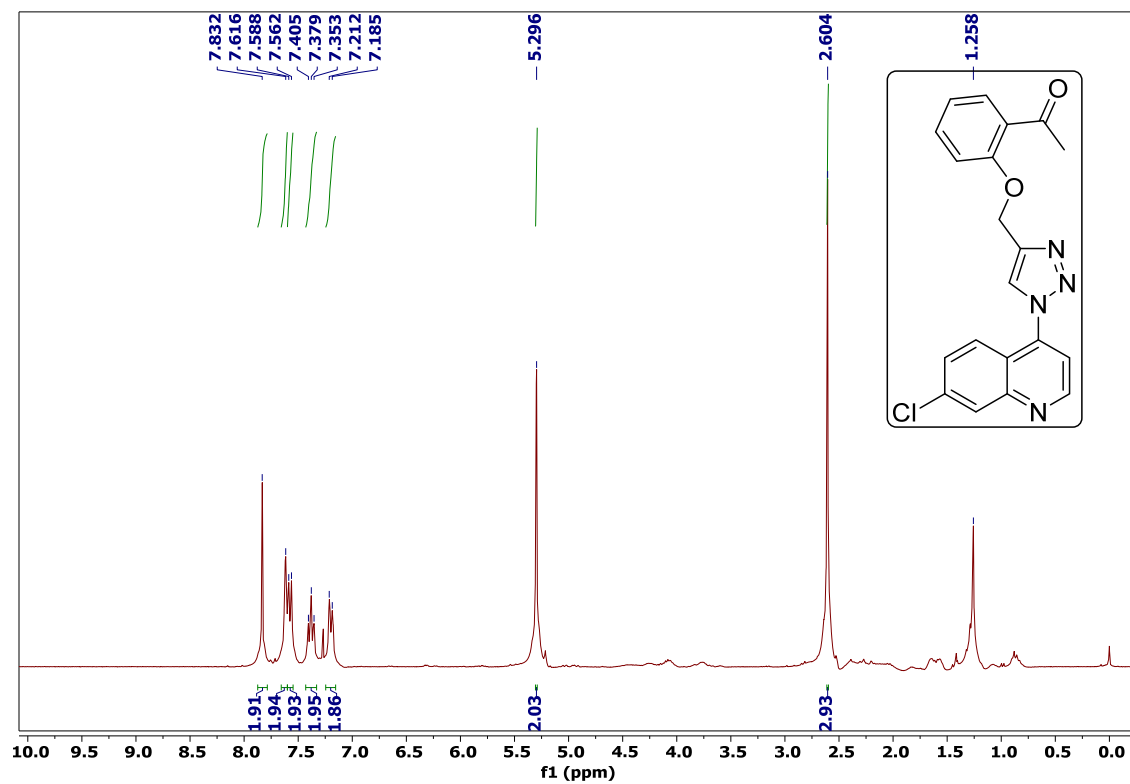

Figure S43:  $^1\text{H}$  NMR of Tr17

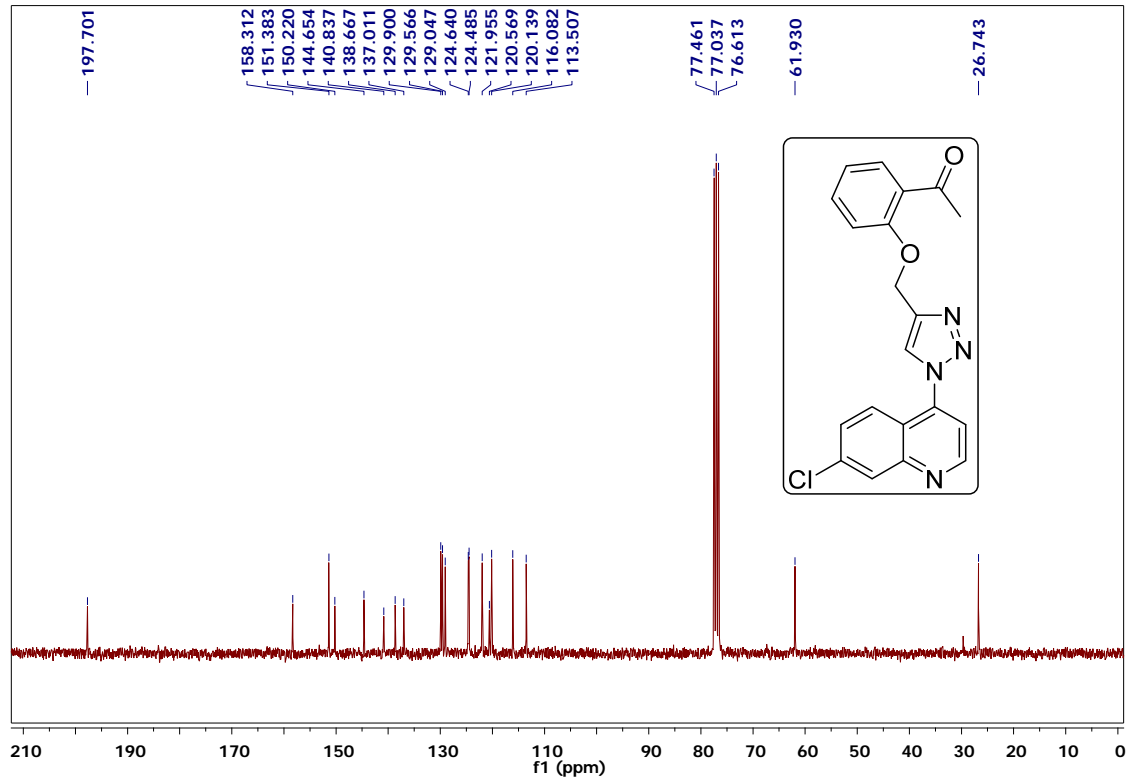

Figure S44:  $^{13}\text{C}$  NMR of Tr17



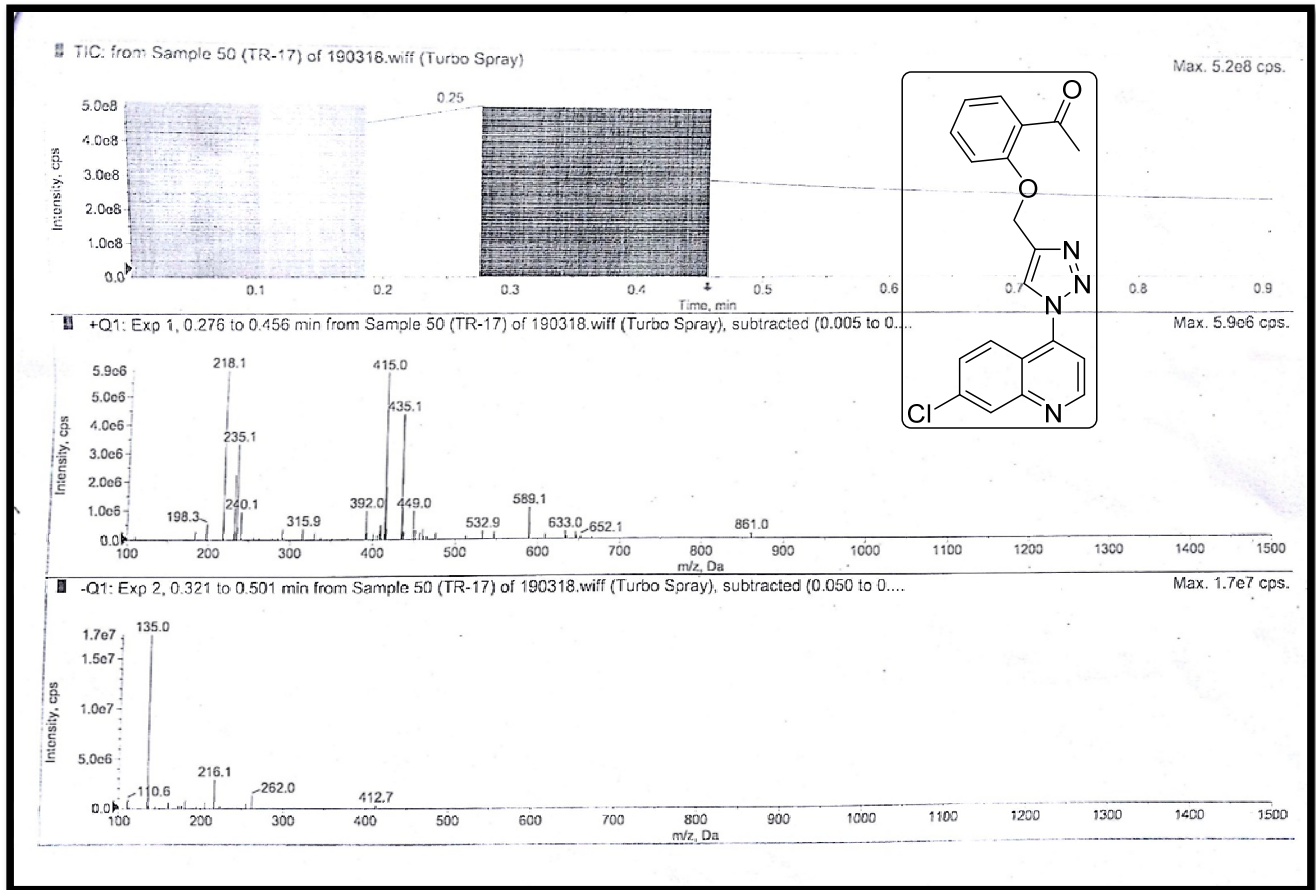

Figure S45: Mass spectrum of Tr17

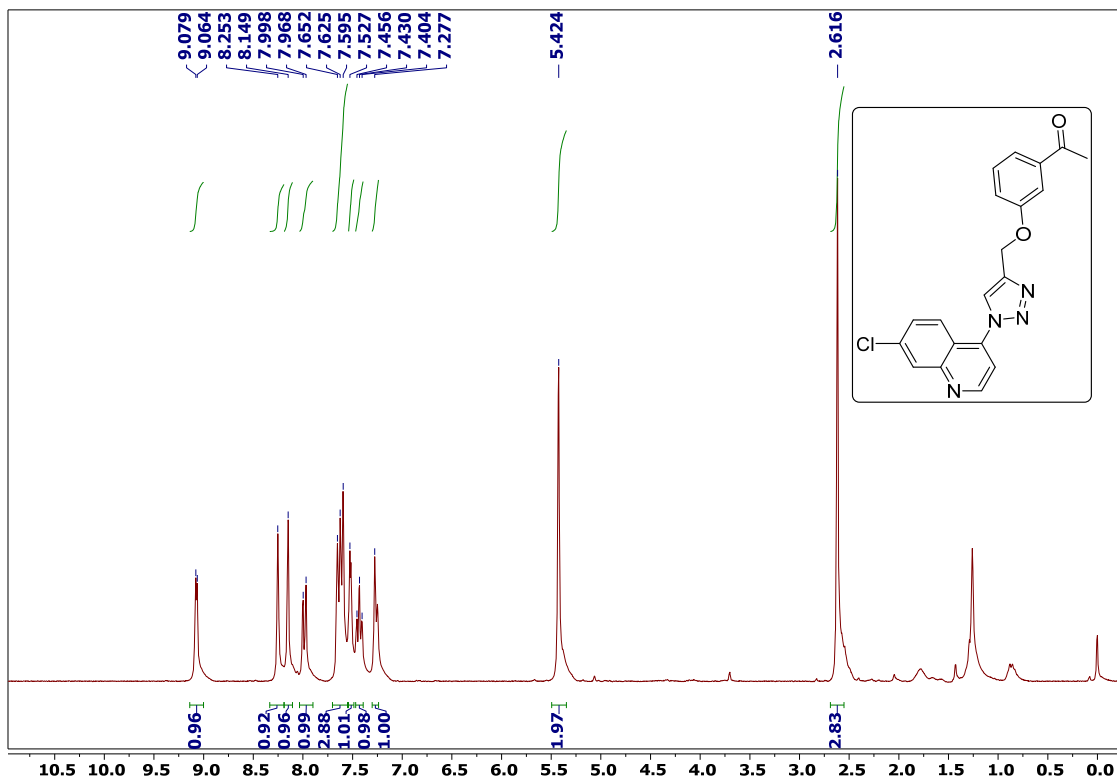

Figure S46:  $^1\text{H}$  NMR of Tr18

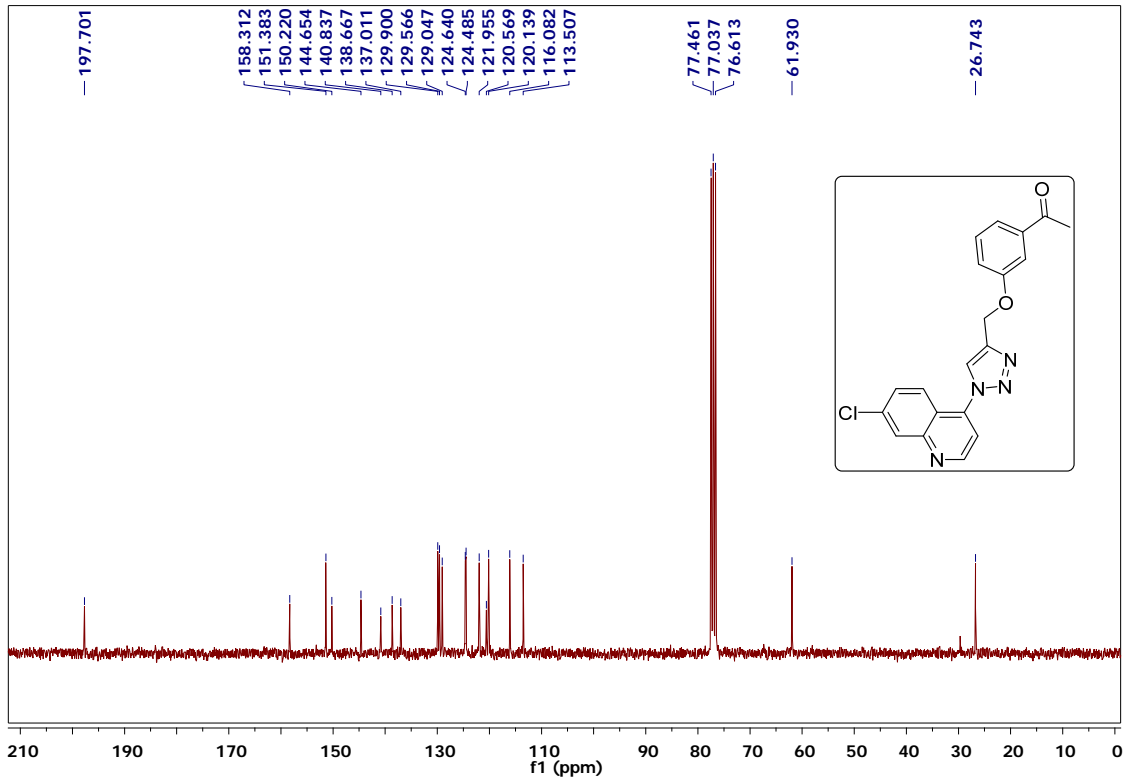

Figure S47:  $^{13}\text{C}$  NMR of Tr18

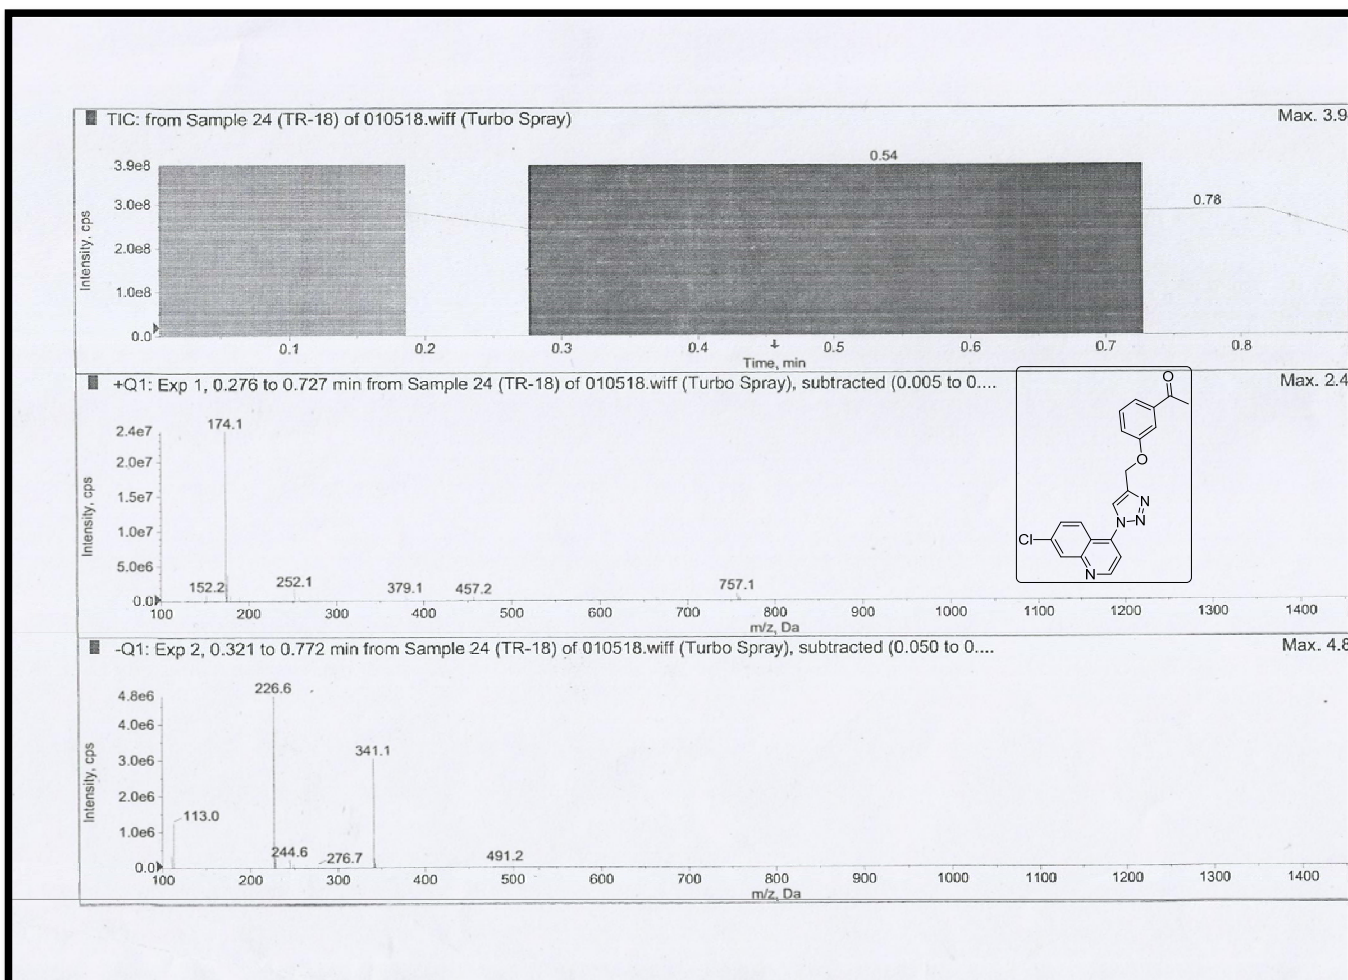

Figure S48: Mass spectrum of Tr18

## References

- 1 N. Yadav, D. Agarwal, S. Kumar, A. K. Dixit, R. D. Gupta and S. K. Awasthi, *Eur. J. Med. Chem.*, 2018, **145**, 735–745.
- 2 J. Dong, N.-N. Wang, Z.-J. Yao, L. Zhang, Y. Cheng, D. Ouyang, A.-P. Lu and D.-S. Cao, *J. Cheminform.*, 2018, **10**, 29.
